# 1 **Rapid *de novo* assembly of the European eel genome from** 2 **nanopore sequencing reads**

3

4 Hans J. Jansen<sup>1</sup>, Michael Liem<sup>2</sup>, Susanne A. Jong-Raadsen<sup>1</sup>, Sylvie Dufour<sup>3</sup>, Finn-Arne  
5 Weltzien<sup>4</sup>, William Swinkels<sup>5</sup>, Alex Koelewijn<sup>5</sup>, Arjan P. Palstra<sup>6</sup>, Bernd Pelster<sup>7</sup>, Herman P.  
6 Spaink<sup>2</sup>, Guido E. van den Thillart<sup>1</sup>, Ron P. Dirks<sup>1</sup>, Christiaan V. Henkel<sup>2,8,9,\*</sup>

7

8 <sup>1</sup> ZF-screens B.V., J.H. Oortweg 19, 2333 CH Leiden, The Netherlands

9 <sup>2</sup> Institute of Biology, Leiden University, Sylviusweg 72, 2333 CC Leiden, The Netherlands

10 <sup>3</sup> Muséum National d'Histoire Naturelle, Sorbonne Universités, Research Unit BOREA,  
11 Biology of Aquatic Organisms and Ecosystems, CNRS, IRD, UCN, UA, 75231 Paris Cedex  
12 05, France

13 <sup>4</sup> Norwegian University of Life Sciences, Faculty of Veterinary Medicine, Department of  
14 Basic Science and Aquatic Medicine, PO Box 8146 Dep, 0033 Oslo, Norway

15 <sup>5</sup> DUPAN, PO Box 249, 6700 AE Wageningen, The Netherlands

16 <sup>6</sup> Animal Breeding and Genomics Centre, Wageningen Livestock Research, Wageningen  
17 University & Research, De Elst 1, 6708 WD Wageningen, The Netherlands

18 <sup>7</sup> Institute of Zoology and Center for Molecular Biosciences, University of Innsbruck,  
19 Innsbruck, Austria

20 <sup>8</sup> University of Applied Sciences Leiden, Zernikedreef 11, 2333 CK Leiden, The Netherlands

21 <sup>9</sup> Generade Centre of Expertise in Genomics, PO Box 382, 2300 AJ Leiden, The Netherlands

22

23 E-mail addresses:

24 <sup>1</sup> Hans J. Jansen: jansen@zfscreens.com

25 <sup>2</sup> Michael Liem: m.liem@biology.leidenuniv.nl

26 <sup>1</sup> Susanne A. Jong-Raadsen: jongraadsen@zfscreens.com

27 <sup>3</sup> Sylvie Dufour: sylvie.dufour@mnhn.fr

28 <sup>4</sup> Finn-Arne Weltzien: finn-arne.weltzien@nmbu.no

29 <sup>5</sup> William Swinkels: wswinkels@dupan.nl

30 <sup>5</sup> Alex Koelewijn: akoelewijn@dupan.nl

31 <sup>6</sup> Arjan P. Palstra: arjan.palstra@wur.nl

32 <sup>7</sup> Bernd Pelster: Bernd.Pelster@uibk.ac.at

33 <sup>2</sup> Herman P. Spaink: h.p.spaink@biology.leidenuniv.nl

34 <sup>1</sup> Guido E. van den Thillart: gvdthillart@gmail.com

35 <sup>1</sup> Ron P. Dirks: dirks@zfscreens.com

36 <sup>2,8,9</sup> Christiaan V. Henkel: c.v.henkel@biology.leidenuniv.nl

37

38 \*Corresponding author:

39 Christiaan V. Henkel

40 E-mail: c.v.henkel@biology.leidenuniv.nl; Phone: +31-71-5274759

## 41 **Abstract**

42 We have sequenced the genome of the endangered European eel using the MinION by Oxford  
43 Nanopore, and assembled these data using a novel algorithm specifically designed for large  
44 eukaryotic genomes. For this 860 Mbp genome, the entire computational process takes two  
45 days on a single CPU. The resulting genome assembly significantly improves on a previous  
46 draft based on short reads only, both in terms of contiguity (N50 1.2 Mbp) and structural  
47 quality. This combination of affordable nanopore sequencing and light-weight assembly  
48 promises to make high-quality genomic resources accessible for many non-model plants and  
49 animals.

50

51 Keywords: nanopore sequencing, genome assembly, eels, TULIP

## 52 **Background**

53 Just ten years ago, having one's genome sequenced was the privilege of a handful of humans  
54 and model organisms. Spectacular improvements in high-throughput technology have since  
55 made personal genome sequencing a reality and prokaryotic genome sequencing routine. In  
56 addition, sequencing the larger genomes of non-model eukaryotes has opened up a wealth of  
57 information for plant and animal breeding, conservation, and fundamental research.

58 As an example, we and others [1–3] have previously established genomic resources for the  
59 European eel (*Anguilla anguilla*), an iconic yet endangered fish species that remains resistant  
60 to efficient farming in aquaculture [4, 5]. A draft genome [2], several transcriptomes (e.g. [1,  
61 3, 6–10]), and reduced representation genome sequencing [11] have already shed light on its  
62 evolution and developmental biology [2, 12, 13], endocrinological control of maturation [7,  
63 8], metabolism [14], disease mechanisms [10], and population structure [15, 16], thereby

64 supporting both breeding and conservation efforts. However, compared to established model  
65 organisms, funds for eel genomics are naturally limited, and consequently the quality of  
66 current genome assemblies of *Anguilla* species is modest at best by today's standards (Table  
67 1).

68

69 **Table 1. Previous genome assemblies of *Anguilla* species**

| Species            | Reference | NCBI WGS reference | Assembly methods | Contigs sum           | Scaffolds sum | Contig N50 | Scaffold N50 | Scaffold gaps |
|--------------------|-----------|--------------------|------------------|-----------------------|---------------|------------|--------------|---------------|
| <i>A. anguilla</i> | [2]       | AZBK01             | CLC bio + SSPACE | 969 Mbp <sup>1</sup>  | 923 Mbp       | 1672 bp    | 77.6 kbp     | 134 Mbp       |
| <i>A. japonica</i> | [36]      | AVPY01             | CLC bio + SSPACE | 1.13 Gbp <sup>1</sup> | 1.15 Gbp      | 3340 bp    | 52.8 kbp     | 127 Mbp       |
| <i>A. rostrata</i> | [37]      | LTYT01             | Ray + SSPACE     | 1.19 Gbp              | 1.41 Gbp      | 7397 bp    | 86.6 kbp     | 223 Mbp       |

70 <sup>1</sup> Not all contigs obtained by *de novo* assembly were used in scaffold construction.

71

72 The recent availability of affordable long-read sequencing technology by Oxford Nanopore  
73 Technologies (ONT, [17]) presents excellent opportunities for generating high-quality  
74 genome assemblies for any organism (for examples, see [18]). Flowcells for the miniature  
75 MinION sequencing device employ a maximum of 512 nanopores concurrently for reading  
76 single-stranded DNA at up to 450 nucleotides per second, resulting in several gigabases of  
77 sequence during a two day run. As the technology does not rely on PCR or discrete strand  
78 synthesis events, DNA fragments can be of arbitrarily long length. The single-molecule reads  
79 are of increasingly good quality, with a sequence identity of ~75% for the older R7.3  
80 chemistry [17], to ~89% for the newer R9 chemistry (MinION Analysis and Reference

81 Consortium, in preparation). Optionally, DNA can be read twice (along both strands) to yield  
82 a consensus ‘2D’ read of higher accuracy (up to ~94% for R9).

83 In contrast to short reads, long reads offer the possibility to span repetitive or otherwise  
84 difficult regions in the genome, resulting in strongly reduced fragmentation of the assemblies.  
85 This potential advantage does require the deployment of dedicated genome assembly  
86 algorithms that are aware of long-read characteristics. In addition, as single-molecule long-  
87 read technologies (by both PacBio and ONT) do suffer from reduced sequence identity, this  
88 likewise needs to be addressed by post-sequencing bioinformatics [19–21]. Dealing with these  
89 challenges has reinvigorated research into genome assembly methodology, resulting in several  
90 novel strategies [22–26].

91 However, when dealing with large eukaryotic genomes, the computational demands for long-  
92 read assembly are often higher than for short reads (using De Bruijn-graphs), even though the  
93 raw data are more informative of genome structure. Especially now that sequencing very large  
94 plant and animal genomes is finally becoming both technologically feasible and affordable,  
95 the computational costs may turn out to be prohibitive. For example, using the state-of-the-art  
96 Canu assembler [23], assembling a human genome from long PacBio reads takes thousands of  
97 CPU hours, or several days on a computer cluster. As scaling behavior is approximately  
98 quadratic with genome size, assembling a salamander [27] or lungfish [28] genome dozens of  
99 gigabases long would require several years on a cluster.

100 We are currently developing a computational pipeline specifically intended for future  
101 sequencing of extremely large tulip genomes (up to 35 Gbp, [29]). Here, we use a prototype  
102 of this algorithm to assemble a new version of the European eel genome, based on Oxford  
103 Nanopore sequencing. This entire computational process takes two days on a desktop

104 computer, and yields an assembly that is two orders of magnitude less fragmented than the  
105 previous Illumina-based draft.

## 106 **Results**

### 107 *Eel genome sizes and previous assemblies*

108 Before launching a genome sequencing effort, an estimate of the size of the genome of  
109 interest is needed. For the genus *Anguilla*, several studies have used flow cytometry and other  
110 methods to arrive at C-values ranging from 1.01 to 1.67 pg [30], corresponding to haploid  
111 genome sizes in the 1–1.6 Gbp range for both *A. anguilla* and *A. rostrata*. We previously  
112 estimated a genome size of approximately 1 Gbp for *A. anguilla*, using human cells as a  
113 reference [2].

114 Based on their assembled genomes, *Anguilla* species exhibit a similarly wide range of  
115 apparent genome sizes (see Table 1). These draft assemblies are all based on previous-  
116 generation short-read technology, and relied on Illumina mate pairs to supply long-range  
117 information used in scaffolding. The resulting assemblies remain highly fragmented, with low  
118 N50 values even considering the technology used.

119 We therefore examined *k*-mer profiles in the raw Illumina sequencing data, which can provide  
120 an estimate of the length of the haploid genome [31, 32]. Surprisingly, the predicted genome  
121 sizes are considerably – but consistently – smaller than previously estimated or assembled  
122 (Table 2 and Fig. S1). In addition, all three examined genomes contain high levels of  
123 heterozygosity.

124

125 **Table 2. *Anguilla* genome size predictions**

| Species                         | Haploid genome size <sup>1</sup> | Repetitive fraction <sup>1</sup> | Heterozygous fraction <sup>1</sup> |
|---------------------------------|----------------------------------|----------------------------------|------------------------------------|
| <i>A. anguilla</i>              | 854.0–866.5 Mbp                  | 15.5–20.0%                       | 1.48–1.59%                         |
| <i>A. japonica</i> <sup>2</sup> | 1.022 Gbp                        | 38.7%                            | 2.74%                              |
| <i>A. rostrata</i>              | 799.0–813.0 Mbp                  | 12.2–16.9%                       | 1.50–1.60%                         |

126 <sup>1</sup> Ranges are the minimum and maximum values reported for three model fits at different *k*-  
127 mer lengths. Apparent repetitive sequence decreases with *k*-mer length, and heterozygosity  
128 increases with *k*-mer length.

129 <sup>2</sup> For *A. japonica*, the model did not converge in most cases, presumably because of low  
130 coverage. These results are for *k* = 19.

131

132 ***Nanopore sequencing***

133 We isolated DNA for long-read sequencing from the blood and liver of a fresh female  
134 European eel. Using three different generations of the ONT chemistry for the MinION  
135 sequencer, we generated 15.6 Gbp of raw shotgun genome sequencing data (see Table 3 and  
136 Fig. 1). Assuming an 860 Mbp haploid size, this corresponds to approximately 18-fold  
137 coverage of the genome. The bulk of the sequence is in long or very long reads (up to  
138 hundreds of thousands of nucleotides), although a fraction is composed of very short reads or  
139 artifacts (e.g. 6 bp reads, Fig. 1). We used all raw reads for subsequent genome assembly.

140

141 **Table 3. Nanopore sequencing**

| Chemistry | Total yield | Read N50 | Longest read |
|-----------|-------------|----------|--------------|
| R7.3 2D   | 245.0 Mbp   | 10345 bp | 71212 bp     |
| R9 1D     | 4.488 Gbp   | 19052 bp | 233352 bp    |
| R9 2D     | 975.7 Mbp   | 8073 bp  | 45931 bp     |
| R9.4 1D   | 9.920 Gbp   | 11852 bp | 215759 bp    |

142

143

144 *Assembly strategy*

145 We assembled the long nanopore sequencing reads using a prototype of an assembly strategy  
146 we are developing for very large genomes (M. Liem and C. Henkel, in preparation), named  
147 TULIP (for *The Uncorrected Long-read Integration Process*). Briefly, it takes two shortcuts  
148 compared to the hierarchical approach [20–24]. First of all, like Miniasm [25], TULIP does  
149 not correct noisy single-molecule reads prior to assembly, but relies on a discrete post-  
150 assembly consensus correction application, e.g. Racon [19] or Pilon [33, 34]. Secondly, it  
151 does not perform an all-versus-all alignment of reads, but instead aligns reads to a sparse  
152 reference (of ‘seed’ sequences) that is representative for the genome.

153 Fig. 2a illustrates the steps we have taken to assemble the European eel genome. In this case,  
154 we employed previously generated Illumina shotgun sequencing reads as sparse seeds. Using  
155 a  $k$ -mer counting table, we identified merged read pairs that are suitably unique in the  
156 genome. Using strict criteria (see Methods), we could select 5019778 fragments of 270 bp, or  
157 873058 of 285 bp, corresponding to 1.58-fold or 0.29-fold coverage of the genome,  
158 respectively. We subsequently used several random subsets of these fragments as a reference  
159 to align long nanopore reads against.

160 Using a custom script, we constructed a graph based on these alignments, in which the seed  
161 sequences are nodes, and edges represent long read fragments (Fig. 2b). A connection  
162 between two seeds indicates they co-align to a long read, and are therefore presumably  
163 located in close proximity in the genome. In theory, perfect alignments of very long reads to  
164 unique seeds should organize both sets of data into linear scaffolds.

165 However, because of the errors still present in long nanopore reads, the alignments are  
166 imperfect, with missed seed alignments making up the bulk of ambiguities in the seed graph



167 (i.e. forks and joins in the seed path). Additional uncertainties are introduced by spurious  
168 alignments and residual apparently repetitive seeds. The tangles these cause in the graph can  
169 be recognized locally, and are removed during a graph simplification stage (Fig. 2c). TULIP  
170 will visit every seed that has multiple in- or outgoing connections, and attempt to simplify the  
171 local graph topology by removing connections. For example, if a single seeds fails to align to  
172 a single nanopore read, this will introduce a ‘triangle’ in the graph (Fig. 2c, top example), in  
173 which the neighbouring seeds now share a direct connection (based on that single read). If the  
174 intermediate seed fits between the neighbouring seeds, TULIP will then remove the  
175 connection spanning the intermediate seed. If after this stage a seed still has too many  
176 connections, it might represent repetitive content and its links are severed altogether (Fig. 2c,  
177 second example).

178 Finally, unambiguous linear arrangements of seeds can be extracted from the graph. Fig. 3  
179 illustrates a small fragment of the actual seed graph, with final linear paths (scaffolds) and  
180 removed connections indicated.

181 These ordered seed scaffolds do not yet contain sequence data. These can subsequently be  
182 added from the original nanopore reads and alignments, resulting in uncorrected scaffold  
183 sequences. The scaffolds are exported bundled with their constituent nanopore reads, and can  
184 be subjected to standard nanopore sequence correction procedures.

185

### 186 *Assembly characteristics*

187 We used several combinations of short seed sequences and aligned nanopore reads to  
188 optimize the assembly process. In most cases, we did not complete the entire assembly  
189 process by adding actual nanopore sequence. Therefore, distances between seeds (and  
190 scaffold lengths) are means based on multiple nanopore reads. Adding specific sequence (and

191 subsequently correcting scaffolds) can change these figures slightly. Table 4 lists the  
192 assembly statistics for these experimental runs.

193

194 **Table 4. *A. anguilla* genome assemblies using TULIP**

| Seed size | Seed number | Read selection | Scaffold N50 <sup>1</sup> | Nr. of scaffolds | Assembly size <sup>1</sup> |
|-----------|-------------|----------------|---------------------------|------------------|----------------------------|
| 285 bp    | 873k        | 100%           | 1170852 bp                | 2366             | 849.7 Mbp                  |
| 285 bp    | 873k        | 75%            | 697683 bp                 | 3531             | 839.0 Mbp                  |
| 285 bp    | 873k        | 50%            | 341223 bp                 | 6919             | 815.0 Mbp                  |
| 285 bp    | 873k        | 25%            | 90534 bp                  | 21764            | 730.4 Mbp                  |
| 285 bp    | 437k        | 100%           | 719956 bp                 | 3173             | 802.6 Mbp                  |
| 285 bp    | 218k        | 100%           | 361910 bp                 | 4889             | 709.6 Mbp                  |
| 270 bp    | 1746k       | 100%           | 1185122 bp                | 2805             | 875.6 Mbp                  |
| 270 bp    | 1310k       | 100%           | 1300479 bp                | 2317             | 866.7 Mbp                  |
| 270 bp    | 873k        | 100%           | 1176872 bp                | 2330             | 851.0 Mbp                  |
| 270 bp    | 437k        | 100%           | 711245 bp                 | 3132             | 802.6 Mbp                  |

195 <sup>1</sup> Sizes based on mean distances between seeds.

196

197 Both the contiguity and size of the assembly clearly improve upon adding more nanopore data  
198 (Fig. 4a, b). This suggests that at 18-fold coverage of this genome, and using the particular  
199 blend of data types available here, the assembly process is still limited by the total quantity of  
200 long read data.

201 For the seeds, we investigated the effects of seed length (270 or 285 bp), as well as seed  
202 density (fractions and multiples based on the 873058 fragments available at 285 bp). There  
203 does not appear to be a clear advantage to choosing either 270 or 285 bp seeds. At identical  
204 densities, the two possibilities yield comparable assemblies in terms of size and contiguity.  
205 For seed density, there does appear to be an optimum. As expected, low densities result in  
206 fragmentation and incompleteness (Fig. 4c, d). The assemblies with the highest seed density  
207 (1.3 or 1.7 million 270 bp sequences) do yield the highest N50 and assembly sum (Table 4),

208 but also exhibit increased fragmentation compared to lower seed densities. As Fig. 4c shows,  
209 the main difference with those assemblies is the appearance of many small scaffolds at high  
210 seed numbers.

211 Accidentally, in this case the optimal seed density is around the ‘full’ set of 873058  
212 fragments, of either 270 or 285 bp. Both also yield an assembly that is close to the estimated  
213 genome length. We selected the 285 bp version as a candidate for an updated reference  
214 genome for the European eel.

215 Fig. 4 summarizes several characteristics of the candidate assembly (before sequence addition  
216 or correction). The length distribution of the 2366 scaffolds (Fig. 4a) shows they range in size  
217 between 431 bp and 8.7 Mbp. The lower boundary is expected, as a minimal scaffold has to  
218 consist of at least two 285 bp seeds, and the graph construction was executed with parameters  
219 allowing limited overlap between seeds. The cumulative scaffold length distributions (Fig. 4b)  
220 show that a considerable fraction of the genome is included in large scaffolds, with 232  
221 scaffolds larger than a megabase constituting 56% of the assembly length. Seeds in the final  
222 scaffolds are connected by on average 7.4 nanopore read alignments. As can be seen in Fig.  
223 4e, links removed during the graph simplification stage (mostly based on local graph topology  
224 only) were predominantly those supported by less evidence.

225 The final assembly retains 637792 seeds of 285 bp, equivalent to a maximum of 181.8 Mbp of  
226 Illumina-derived sequence. If the seed distribution is assumed to be essentially random (with  
227 local genomic architecture responsible for exceptions), the initial 873058 seeds should be  
228 spaced at a mean interval of 700 bp. As seeds are removed during simplification, larger ‘gaps’  
229 filled with nanopore-derived sequence should appear. However, as Fig. 4f shows, gap lengths  
230 are heavily biased towards low and negative lengths (i.e. overlapping seeds). In this case, this  
231 could be an artifact of the very stringent seed selection procedure.

232

233 *Assembly quality*

234 In order to assess its completeness and structural correctness, we added nanopore sequence to  
235 the selected TULIP assembly and aligned it to the Illumina-based draft genome [2]. As a  
236 high-quality reference genome for the European eel is not yet available, such a comparison  
237 need take into account the possibility of error in either assembly. However, with appropriate  
238 caution, agreement between the assemblies – which are completely independent in both  
239 sequencing data and assembly algorithms – can confirm the integrity of both.

240 Fig. 5a shows a full-genome alignment of the new (uncorrected) nanopore-based assembly to  
241 the 2012 draft [2], based on best pairwise matches. This confirms that at this large scale, all  
242 sequence in the new assembly is also present in the older assembly. At first sight, the  
243 converse does not appear to be the case: the Illumina-based draft is 923 Mbp in size, and  
244 contains approximately 96 Mbp in scaffolds that have no reciprocal best match in the  
245 nanopore assembly (863.3 Mbp after sequence addition, see Table 5). However, the non-  
246 matching sequences consist almost exclusively of very small scaffolds (mean/N50 664/987  
247 bp). Since the Illumina-based draft assembly also contains 134 Mbp in gaps, these small  
248 scaffolds are plausibly sequences that could not be integrated correctly during the SSPACE  
249 scaffolding process [35, 36]. Both assemblies therefore roughly span the entire predicted  
250 genome of 860 Mbp.

251

252 *Table 5. Characteristics of the A. anguilla candidate assembly*

| Statistic                | Value     | Note        |
|--------------------------|-----------|-------------|
| Number of scaffolds      | 2366      |             |
| Seed graph scaffold N50  | 1.17 Mbp  | cf. Table 4 |
| Seed graph assembly sum  | 849.7 Mbp | cf. Table 4 |
| Uncorrected scaffold N50 | 1.19 Mbp  |             |

|                          |            |                       |
|--------------------------|------------|-----------------------|
| Uncorrected scaffold sum | 863.3 Mbp  |                       |
| Racon scaffold N50       | 1.21 Mbp   |                       |
| Racon assembly sum       | 881.3 Mbp  |                       |
| Pilon scaffold N50       | 1.23 Mbp   |                       |
| Pilon assembly sum       | 891.7 Mbp  |                       |
| Alignment time           | 7 hours    | 1 thread <sup>1</sup> |
| Seed graph time          | 51 minutes | 1 thread              |
| Sequence addition time   | 14 minutes | 1 thread              |
| Racon correction time    | ~22 hours  | 1 thread <sup>1</sup> |
| Pilon correction time    | ~24 hours  | 1 thread <sup>1</sup> |

253 <sup>1</sup> These stages can be sped up by multithreading. For example, the actual alignment was run  
254 with four concurrent threads in 2 hours, 34 minutes.

255

256 Fig. 5b–f show detailed alignments, based on the 5 largest nanopore scaffolds (6.1–8.9 Mbp  
257 uncorrected) and their best matches only. These alignments confirm that in this sample both  
258 assemblies are mostly collinear, with the smaller Illumina draft scaffolds usually aligning end-  
259 to-end on the larger TULIP scaffolds. Therefore, both presumably reflect the actual genomic  
260 organization. However, at this level of detail several structural incongruities between both  
261 assemblies also become apparent (indicated by arrowheads). For 16 scaffolds from the 2012  
262 draft, only part of the sequence is present in the selected TULIP scaffolds. In other words, at  
263 these loci both assembly protocols made different choices, based on the available sequencing  
264 information.

265 We therefore examined the evidence for the decisions made by TULIP. For each discrepancy,  
266 we examined the local neighbourhoods in the initial nanopore-based seed graphs (as in Fig.  
267 3). If a draft scaffold is correct, at the inconsistency there should be multiple alternatives for  
268 the TULIP algorithm to choose from (Fig. S2). As these subgraphs (Fig. S3–S7) show, there  
269 is no evidence in the nanopore data for the older draft structure for any of the 16 cases  
270 examined. On the contrary, most local graph neighbourhoods appear relatively simple and  
271 support unambiguous scaffolding paths. The links at these suspect junctions are supported by

272 at least two (average six) independent nanopore reads, which reduces the likelihood of  
273 accidental connections (caused by e.g. chimaeric reads).

274 Alternatively, the order of the draft scaffolds in the alignments already suggests which of the  
275 two assemblies is correct. If one of the 16 problematic scaffolds were to reflect the legitimate  
276 genome structure, this error in the new assembly would usually also affect the next aligning  
277 scaffold. However, in almost all cases, the neighbouring draft scaffold aligns end-to-end. This  
278 suggests that either the TULIP assembly intermittently features very large rearrangements that  
279 accidentally always end at draft scaffold boundaries, or that the draft scaffolds are  
280 occasionally misconstrued.

281 Finally, the distribution of draft scaffolds along the nanopore-based scaffolds reveal an  
282 interesting pattern. The distribution of draft scaffold length along the genome is clearly non-  
283 random, with some regions assembled into just a few large scaffolds, whereas other regions  
284 (often up to a Mbp in size) are highly fragmented into very small scaffolds. This indicates that  
285 using short-read technology, certain genomic features are intrinsically harder to assemble than  
286 using long reads.

287

### 288 *Sequence correction*

289 Currently, the ONT platform does not yield reads of perfect sequence identity. Like with  
290 PacBio data, therefore, at some point in the assembly process the single-molecule-derived  
291 sequence needs to be corrected by extracting a consensus from multiple reads covering every  
292 genomic position. Here, we opted for a standalone post-assembly correction step with Racon,  
293 which extracts a consensus from nanopore reads [19]. As some positions in the assembly are  
294 based on a single nanopore reads (Fig. 4e), in this case this correction may not be sufficient.

295 Therefore, we subsequently corrected with Pilon, which extracts a consensus based on  
296 alignment of Illumina reads to the noisy sequence [33, 34]).

297 To assess the changes made by these correction algorithms, we counted and compared the  
298 occurrence of 6-mers in the draft Illumina-based assembly, the uncorrected TULIP assembly,  
299 and after correction (Fig. 6). These frequencies reveal several expected patterns, specifically a  
300 slight underrepresentation of high CG content in Illumina-based sequence (draft and Pilon),  
301 and an underrepresentation of homopolymer sequence in nanopore-based sequence (TULIP  
302 and Racon) [17]. Overall, the correction steps bring the sequence similarity of the nanopore-  
303 based assembly closer to the Illumina-based draft, with the final corrected assembly having a  
304 high correlation to the draft (Fig. 6 lower left panel).

305 Sequence correction remains the most time-consuming stage of the assembly, requiring 22  
306 and 24 hours (on a single CPU) for Racon and Pilon, respectively (Table 5). As TULIP  
307 bundles uncorrected scaffolds with its constituent nanopore reads, this process could still be  
308 sped up by parallelization, with individual scaffolds distributed over concurrent correction  
309 threads.

## 310 Discussion

311 In this study, we have evaluated whether it is possible to sequence a vertebrate genome using  
312 nanopore long-read technology, and quickly assemble it using a relatively simple and  
313 lightweight procedure.

314 One of the most striking outcomes of this eel genome sequencing effort is the surprisingly  
315 close match between the genome size predicted from *k*-mer analysis (~860 Mbp) and the  
316 TULIP assembly (891.7 Mbp after corrections), and their distance from short-read-based  
317 assemblies. This can be explained either by the absence of a substantial fraction of the

318 genome from the nanopore data or assembly, or by an artificially inflated genome size for the  
319 short-read assemblies. Full-genome alignment between both assemblies (Fig. 5a) suggests the  
320 latter phenomenon is at least partially responsible, as only tiny short-read scaffolds are absent  
321 from the long-read assembly.

322 An analysis of the short-read *A. anguilla* [2] and *A. japonica* [36] assembly procedures  
323 implies that the scaffolding process, based on mate pair data, is responsible for the  
324 introduction of numerous gaps (Table 1). In addition, at the time we discarded a considerable  
325 fraction of the initial contigs, which was composed primarily of very small contigs that  
326 appeared to be artefactual (based on low read coverage or very high similarity to other  
327 contigs). Plausibly, such contigs – and the high residual fragmentation of these assemblies –  
328 are the result of the high levels of heterozygosity in these genomes (Fig. S1).

329 Similar processes could also explain the even larger discrepancy between the predicted and  
330 assembled size of the recently published genome of the American eel *A. rostrata* (Table 1,  
331 [37]). As European and American eels interbreed in the wild [38], a large difference in  
332 genome size is unlikely – although it could also provide an explanation for the observed  
333 limited levels of gene flow between the species [16].

334 The whole-genome alignments between the Illumina draft and the new nanopore-based  
335 assembly (Fig. 5) also serve to confirm the structural accuracy of both. In a small sample  
336 (corresponding to of 4.2% of the genome), we observed 16 apparent assembly errors (Fig. 5b–  
337 f). In the absence of a high-quality reference, it is difficult to establish which assembly is  
338 correct. However, our analyses strongly suggest that in these cases the nanopore-based  
339 assembly is accurate. This is not unexpected: TULIP has access to far richer and more  
340 accurate sequencing information than SSPACE, which had to rely on 2×36 bp mate pair data.  
341 Under such circumstances, a low number of incorrect joins between contigs is inevitable [39].



342 In fact, considering the fact that the SSPACE scaffolds analyzed in Fig. 5b–f consist of on the  
343 order of ten thousand very small contigs, a result with only 16 errors signifies better  
344 scaffolding performance than expected [39].

345 In other aspects, the TULIP assembly is likely to be suboptimal. By design, scaffolds that  
346 could be merged based on long reads remain separate if these reads do not share a fortuitous  
347 seed alignment in the correct position. Similarly, large repetitive regions in the genome, as  
348 well as (sub)telomeric repeats will not always contain frequent 285 bp islands of unique  
349 sequence, and hence could be absent from the assembly. Although counterintuitive, this  
350 should not pose a major problem for some extremely large genomes. Survey sequencing  
351 indicates that the 32 Gbp axolotl genome contains mostly unique sequence [27], as do many  
352 tulip genomes (C. Henkel, unpublished data).

353 The selection of sparse seeds by the user adds an unusual level of flexibility to the assembly  
354 process. In an early phase of this study, we opted for essentially randomly placed Illumina-  
355 based seed sequences. This choice was motivated by their very high sequencing identity,  
356 which aids alignment quality when working with early, error-prone nanopore chemistries  
357 [17]. However, with the speed at which the quality of reads produced by the ONT platform is  
358 improving [18], it should soon be possible to avoid such a hybrid assembly altogether. A  
359 natural choice for seed sequences would then be the ends of long reads.

360 Alternatively, seeds could be chosen to facilitate further sequence integration. If a high  
361 density genetic map is available for a species, map markers could serve as pre-ordered seeds.  
362 For example, with minor modifications, TULIP might be used to selectively add long read  
363 sequencing data only to single map marker bins (containing thousands of actual, unordered  
364 markers) resulting from a population sequencing strategy [40].

365 The bottleneck for such strategies lies in the interplay between marker density and nanopore  
366 read length, where the latter currently appears to be limited chiefly by DNA isolation  
367 protocols [41, 42]. Conceivably, in the near future, the problem of genome assembly from  
368 sequencing reads will all but disappear: abundant megabase-sized reads of high sequence  
369 identity are becoming conceivable, which should span the vast majority of recalcitrant regions  
370 in medium-sized genomes that remain a challenge to short- and medium-read technologies.  
371 The fulfillment of such prophecies may still lie several years in the future. Therefore, we plan  
372 to further integrate and validate the candidate assembly generated here with long-range  
373 information obtained from optical mapping [43], in order to develop a high-quality reference  
374 genome for the troubled European eel.

## 375 **Conclusion**

376 We have developed a new, simple methodology for the rapid assembly of large eukaryote  
377 genomes using a combination of long reads and short seed sequences. Using this method, we  
378 could assemble the 860 Mbp genome of the European eel using 18× nanopore coverage and  
379 sparse pre-selected Illumina reads in three hours on a modest desktop computer. Including  
380 subsequent sequence correction, the entire process takes two days. This yields an assembly  
381 that is essentially complete and of high structural quality.

## 382 **Methods**

### 383 *Genome size estimation and k-mer analyses*

384 We used Jellyfish version 2.2.6 [44] to count *k*-mers in sequencing reads and assemblies. In  
385 order to estimate genome size, we obtained frequency histograms for 19- to 25-mers in raw  
386 Illumina sequencing data. Reads were truncated to a uniform length of 76 nt, except for *A*.

387 *japonica*, for which we used 100 nt (the model did not converge for short lengths). For the  
388 American eel, which has been sequenced at much higher coverage than the European and  
389 Japanese species, we used a subset of the available data (SRR2046741 and SRR2046672).  
390 Histograms were analyzed using the GenomeScope website [32] in order to obtain estimates  
391 for genome sizes, heterozygosity and duplication levels.

392

### 393 *Illumina seed selection*

394 We selected unique seed sequences from 11.9 Gbp in sequence previously generated at 2×151  
395 nt on an Illumina Hiseq 2000. Pairs were merged using FLASH [45], requiring a minimum of  
396 15 nt terminal overlaps, resulting in 29.16% merged fragments. In these, 25-mers were  
397 counted using Jellyfish. We used a custom script to filter out all fragments that contained 25-  
398 mers occurring over 25 times in the remaining data. This corresponds to a maximum  
399 occurrence of approximately 6.25× in the 860 Mbp genome. Finally, fragments were selected  
400 based on size (either 270 nt or 285 nt).

401

### 402 *DNA purification*

403 High MW chromosomal DNA was isolated from European eel blood and liver samples using  
404 a genomic tip 100 column according to the manufacturer's instructions (Qiagen).

405

### 406 *MinION library preparation and sequencing*

407 The genomic DNA was sequenced using nanopore sequencing technology. First the DNA was  
408 sequenced on R7.3 Flow Cells. Subsequently multiple R9 and R9.4 Flow Cells were used to  
409 sequence the DNA. For R7.3 sequencing runs we prepared the library using the SQK-

410 MAP006 kit from Oxford Nanopore Technologies. Briefly, high molecular weight DNA was  
411 sheared with a g-TUBE (Covaris) to an average fragment length of 20 kbp. The sheared DNA  
412 was repaired using the FFPE repair mix according to the manufacturer's instructions (New  
413 England Biolabs, Ipswich, USA). After cleaning up the DNA with an extraction using a ratio  
414 of 0.4:1 Ampure XP beads to DNA the DNA ends were polished and an A overhang was  
415 added with the the NEBNext End Prep Module and again cleaned up with an extraction using  
416 a ratio of 1:1 Ampure XP beads to DNA the DNA prior to ligation. The adaptor and hairpin  
417 adapter were ligated using Blunt/TA Ligase Master Mix (New England Biolabs). The final  
418 library was prepared by cleaning up the ligation mix using MyOne C1 beads (Invitrogen).

419 To prepare 2D libraries for R9 sequencing runs we used the SQK-NSK007 kit from Oxford  
420 Nanopore Technologies. The procedure to prepare a library with this kit is largely the same as  
421 with the SQK-MAP006 kit. 1D library preparation was done with the SQK-RAD001 kit from  
422 Oxford Nanopore Technologies. In short, high molecular weight DNA was tagmented with a  
423 transposase. The final library was prepared by ligation of the sequencing adapters to the  
424 tagmented fragments using the Blunt/TA Ligase Master Mix (New England Biolabs).

425 Library preparation for R9.4 sequencing runs was done with the SQK-LSK108 and the SQK-  
426 RAD002 kits from Oxford Nanopore Technologies. The procedure to prepare libraries using  
427 the SQK-RAD002 kit was the same as for the SQK-RAD001 kit. For SQK-LSK108 the  
428 procedure was essentially the same as for SQK-NSK007 except that only adapters and no  
429 hairpins were ligated to the DNA fragments. As a consequence the final purification step was  
430 done using Ampure XP beads instead of MyOne C1 beads. Libraries for R7.3 and R9 flow  
431 cells were directly loaded on the flow cells. To load the library on the R9.4 flow cell the DNA  
432 fragments were first bound to beads which were then loaded on the flow cell.

433 The MinKNOW software was used to control the sequencing process and the read files were  
434 uploaded to the cloud based Metrichor EPI2ME platform for base calling. Base called reads  
435 were downloaded for further processing and assembly.

436

#### 437 *Nanopore read alignment*

438 From the base called read files produced by the Metrichor EPI2ME platform sequence files in  
439 FASTA format were extracted using the R-package poRe v0.17 [46]. We used BWA-MEM  
440 [47] to align nanopore reads to selected seeds, using specific settings for each nanopore  
441 chemistry. The built-in *-x ont2d* setting (*-k 14 -W 20 -r 10 -A 1 -B 1 -O 1 -E 1 -L 0*) is too  
442 tolerant for newer chemistries. We therefore optimized alignment settings (*-k* and *-W* only) on  
443 small subsets to yield the highest recall (number of aligning reads) at the highest precision  
444 (number of seeds detected/number of alignments). With all other settings as before, this  
445 yielded the following parameters: *-k 14 -W 45* (R7.3 2D); *-k 16 -W 50* (R9 1D); *-k 19 -W 60*  
446 (R9 2D); *-k 16 -W 60* (R9.4 1D).

447

#### 448 *Genome assembly using TULIP*

449 Currently, TULIP consists of two prototype scripts in Perl: *tulipseed.perl* and *tulipbulb.perl*  
450 (version 0.4 ‘European eel’). The *tulipseed* script constructs the seed graph based on input  
451 SAM files and a set seed length, and outputs a simplified graph and seed arrangements  
452 (scaffold models). *tulipbulb* adds seed and long read sequence to the scaffolds, and exports  
453 either a complete set of uncorrected scaffolds, or for each scaffold two separate files: the  
454 uncorrected sequence, and a FASTA ‘bundle’ consisting of all long reads associated with that  
455 scaffold.

456 For each scaffold, we used the long read bundle and Illumina data to polish it according to  
457 ONT guidelines [48]. We first corrected nanopore-derived scaffolds with nanopore data using  
458 Racon [19], based on alignments produced by Graphmap version 0.3.0 [49]. Ultimately Racon  
459 sequence correction is performed by SPOA [50], which is a partial order alignment algorithm  
460 that generates consensus sequences.

461 Subsequently, we used previously generated Illumina data (trimmed to Phred 30 quality  
462 values using Sickle version 1.33 [51]) in a second correction step using Pilon (version 1.21),  
463 an integrated software tool for assembly improvement [33, 34]. Pilon uses evidence from the  
464 alignment between short-read data and Racon-corrected scaffolds to identify events that are  
465 different in the draft genome compared to the support of short-read data.

466 All genome assembly steps and analyses were performed on a desktop computer equipped  
467 with an Intel Xeon E3-1241 3.5 GHz processor, in a virtual machine (Oracle VirtualBox  
468 version 4.3.26) running Ubuntu 16.04 LTS with 28 GB RAM and 4 processor threads  
469 available. For the final candidate assembly, the TULIP scripts required a maximum of 4.4 GB  
470 RAM.

471

## 472 *Genome alignment*

473 Uncorrected scaffolds were aligned against the 2010 scaffolds using nucmer version 3.23  
474 [52], with settings *--maxmatch* and *--minmatch 100*, filtered for optimal correspondence  
475 (delta-filter -1), and visualized using mummerplot (with the *--layout* option). The five largest  
476 scaffolds were likewise aligned against the 2012 scaffolds, but with settings encouraging  
477 longer alignments (*--breaklen 1000* and *--minmatch 25*) and not filtered. The 285 nt seeds  
478 were aligned against the 2012 draft scaffolds using BWA-MEM with default settings.

## 479 **List of abbreviations**

|     |                    |                                                                  |
|-----|--------------------|------------------------------------------------------------------|
| 480 | bp (kbp, Mbp, Gbp) | Basepairs (thousands, millions, billions of basepairs)           |
| 481 | N50                | The length-weighted median fragment length, such that 50% of the |
| 482 |                    | fragment length sum is in fragments larger than the N50          |
| 483 | <i>k</i> -mer      | A sequence of length <i>k</i>                                    |
| 484 | C-value            | The weight of a haploid genome                                   |
| 485 | CPU                | Central processing unit                                          |
| 486 | ONT                | Oxford Nanopore Technologies                                     |
| 487 | PacBio             | Pacific Biosciences                                              |

488

## 489 **Declarations**

### 490 *Ethics approval*

491 Experiments were approved by the animal ethical commission of Leiden University (DEC  
492 #13060).

493

### 494 *Availability of data and materials*

495 Submission of the nanopore and Illumina sequencing data to ENA and NCBI is in progress.

496 The Illumina and nanopore sequencing data can temporarily be accessed at

497 <https://surfdrive.surf.nl/files/index.php/s/5wOBiWqqyUZV2Yd>

498 The Racon- and Pilon-corrected candidate assembly is available at

499 <http://www.zfgenomics.com/sub/eel>

500 The TULIP-scripts are available at <https://github.com/Generade-nl/TULIP>

501

### 502 *Competing interests*

503 HJJ and CVH are members of the Nanopore Community, and have previously received

504 flowcells free of charge (used for some of the R7.3 data of this project), as well as travel

505 expense reimbursements from Oxford Nanopore Technologies.

506

### 507 *Funding*

508 This project was funded by grants from the DUPAN Foundation for sustainable eel farming

509 and fishing, the Dutch Ministry of Economic Affairs (to APP, KB-21-001-001), the Austrian

510 Science Foundation (to BP, FWF P26363-B25), the European Union's Horizon 2020 research

511 and innovation programme under the Marie Skłodowska-Curie Actions: Innovative Training

512 Network IMPRESS, grant agreement No 642893 (to F-AW), and by local funds from CNRS

513 (to SD) and Generade, the Leiden Centre of Expertise in Genomics (to CVH).

514

### 515 *Authors' contributions*

516 HJJ, SD, F-AW, WS, AK, APP, BP, HPS, GEvdT, RPD and CVH conceived the research.

517 RPD coordinated the project. HJJ and SAJ-R performed sequencing, ML and CVH assembled

518 the genome, HJJ, RPD and CVH analyzed the data. HJJ, ML, RPD and CVH wrote the paper

519 with input from all other authors.



520

## 521 *Acknowledgements*

522 We are grateful to the DUPAN Foundation for making this project possible, as well as to  
523 Rosemary Dokos and Oliver Hartwell at Oxford Nanopore for technical support and  
524 encouragement.

## 525 **References**

- 526 1. Coppe A, Pujolar JM, Maes GE, Larsen PF, Hansen MM, Bernatchez L, Zane L,  
527 Bortoluzzi S. Sequencing, *de novo* annotation and analysis of the first *Anguilla anguilla*  
528 transcriptome: EeelBase opens new perspectives for the study of the critically endangered  
529 European eel. BMC Genomics. 2010;11:635.
- 530 2. Henkel CV, Burgerhout E, de Wijze DL, Dirks RP, Minegishi Y, Jansen HJ, Spaink HP,  
531 Dufour S, Weltzien FA, Tsukamoto K, van den Thillart GE. Primitive duplicate Hox  
532 clusters in the European eel's genome. PLoS One. 2012;7:e32231.
- 533 3. Pujolar JM, Marino IA, Milan M, Coppe A, Maes GE, Capoccioni F, Ciccotti E, Bervoets  
534 L, Covaci A, Belpaire C, Cramb G, Patarnello T, Bargelloni L, Bortoluzzi S, Zane L.  
535 Surviving in a toxic world: transcriptomics and gene expression profiling in response to  
536 environmental pollution in the critically endangered European eel. BMC Genomics.  
537 2012;13:507.
- 538 4. Minegishi Y, Henkel CV, Dirks RP, van den Thillart GE. Genomics in eels – towards  
539 aquaculture and biology. Mar Biotechnol (NY). 2012;14:583–90.
- 540 5. IUCN Red List. 2014;doi:10.2305/IUCN.UK.2014-1.RLTS.T60344A45833138.en
- 541 6. Ager-Wick E, Dirks RP, Burgerhout E, Nourizadeh-Lillabadi R, de Wijze DL, Spaink HP,  
542 van den Thillart GE, Tsukamoto K, Dufour S, Weltzien FA, Henkel CV. The pituitary

- 543 gland of the European eel reveals massive expression of genes involved in the  
544 melanocortin system. PLoS One. 2013;8:e77396.
- 545 7. Dirks RP, Burgerhout E, Brittijn SA, de Wijze DL, Ozupek H, Tuinhof-Koelma N,  
546 Minegishi Y, Jong-Raadsen SA, Spaink HP, van den Thillart GE. Identification of  
547 molecular markers in pectoral fin to predict artificial maturation of female European eels  
548 (*Anguilla anguilla*). Gen Comp Endocrinol. 2014;204:267–76.
- 549 8. Burgerhout E, Minegishi Y, Brittijn SA, de Wijze DL, Henkel CV, Jansen HJ, Spaink HP,  
550 Dirks RP, van den Thillart GE. Changes in ovarian gene expression profiles and plasma  
551 hormone levels in maturing European eel (*Anguilla anguilla*); biomarkers for broodstock  
552 selection. Gen Comp Endocrinol. 2016;225:185–96.
- 553 9. Churcher, AM, Hubbard, PC, Marques, JP, Canário, AV, Huertas, M. Deep sequencing of  
554 the olfactory epithelium reveals specific chemosensory receptors are expressed at sexual  
555 maturity in the European eel *Anguilla anguilla*. Mol Ecol. 2015; 24:822–34.
- 556 10. Pelster, B, Schneebeuer, G, Dirks, RP. *Anguillicola crassus* infection significantly affects  
557 the silvering related modifications in steady state mRNA levels in gas gland tissue of the  
558 European eel. Front Physiol. 2016;7:175.
- 559 11. Pujolar JM, Jacobsen MW, Frydenberg J, Als TD, Larsen PF, Maes GE, Zane L, Jian JB,  
560 Chench L, Hansen MM. A resource of genome-wide single-nucleotide polymorphisms  
561 generated by RAD tag sequencing in the critically endangered European eel. Mol Ecol  
562 Resour. 2013;13:706–14.
- 563 12. Pasquier J, Lafont AG, Jeng SR, Morini M, Dirks R, van den Thillart G, Tomkiewicz J,  
564 Tostivint H, Chang CF, Rousseau K, Dufour S. Multiple kisspeptin receptors in early  
565 osteichthyans provide new insights into the evolution of this receptor family. PLoS One.  
566 2012;7:e48931.

- 567 13. Maugars G, Dufour S. Demonstration of the coexistence of duplicated LH receptors in  
568 teleosts, and their origin in ancestral actinopterygians. *PLoS One*. 2015;10:e0135184.
- 569 14. Morini M, Pasquier J, Dirks R, van den Thillart G, Tomkiewicz J, Rousseau K, Dufour S,  
570 Lafont AG. Duplicated leptin receptors in two species of eel bring new insights into the  
571 evolution of the leptin system in vertebrates. *PLoS One*. 2015;10:e0126008.
- 572 15. Pujolar JM, Jacobsen MW, Als TD, Frydenberg J, Munch K, Jónsson B, Jian JB, Chench  
573 L, Maes GE, Bernatchez L, Hansen MM. Genome-wide single-generation signatures of  
574 local selection in the panmictic European eel. *Mol Ecol*. 2014;23:2514–28.
- 575 16. Jacobsen MW, Pujolar JW, Bernatchez L, Munch K, Jian J, Niu Y, Hansen MM. Genomic  
576 footprints of speciation in Atlantic eels (*Anguilla anguilla* and *A. rostrata*). *Mol Ecol*.  
577 2014;23:4785–4798.
- 578 17. Ip CL, Loose M, Tyson JR, de Cesare M, Brown BL, Jain M, Leggett RM, Eccles DA,  
579 Zalunin V, Urban JM, Piazza P, Bowden RJ, Paten B, Mwaigwisya S, Batty EM, Simpson  
580 JT, Snutch TP, Birney E, Buck D, Goodwin S, Jansen HJ, O'Grady J, Olsen HE, MinION  
581 Analysis and Reference Consortium. MinION Analysis and Reference Consortium: Phase  
582 1 data release and analysis. *F1000Res*. 2015;4:1075.
- 583 18. Jain M, Olsen HE, Paten B, Akeson M. The Oxford Nanopore MinION: delivery of  
584 nanopore sequencing to the genomics community. *Genome Biol*. 2016;17:239.
- 585 19. Vaser R, Sović I, Nagarajan N, Šikić M. Fast and accurate *de novo* genome assembly from  
586 long uncorrected reads. *BioRxiv*. 2016;doi:10.1101/068122.
- 587 20. Koren S, Harhay GP, Smith TP, Bono JL, Harhay DM, Mcvey SD, Radune D, Bergman  
588 NH, Phillippy AM. Reducing assembly complexity of microbial genomes with single-  
589 molecule sequencing. *Genome Biol*. 2013;14:R101
- 590 21. Loman NJ, Quick J, Simpson JT. A complete bacterial genome assembled *de novo* using  
591 only nanopore sequencing data. *Nat Methods*. 2015;12:733–5.

- 592 22. Koren S, Walenz BP, Berlin K, Miller JR, Phillippy AM. Canu: scalable and accurate  
593 long-read assembly via adaptive k-mer weighting and repeat separation. BioRxiv.  
594 2016;doi:10.1101/071282.
- 595 23. Myers, G. <https://dazzlerblog.wordpress.com>. Accessed December 2016.
- 596 24. Chin CS, Peluso P, Sedlazeck FJ, Nattestad M, Concepcion GT, Clum A, Dunn C,  
597 O'Malley R, Figueroa-Balderas R, Morales-Cruz A, Cramer GR, Delledonne M, Luo C,  
598 Ecker JR, Cantu D, Rank DR, Schatz MC. Phased diploid genome assembly with single-  
599 molecule real-time sequencing. Nat Methods. 2016;13:1050–1054.
- 600 25. Li H. Minimap and miniasm: fast mapping and de novo assembly for noisy long  
601 sequences. Bioinformatics. 2016;32:2103–10.
- 602 26. Kamath GM, Shomorony I, Xia F, Courtade TA, Tse DN. HINGE: long-read assembly  
603 achieves optimal repeat resolution. BioRxiv. 2016;doi:10.1101/062117
- 604 27. Keinath MC, Timoshevskiy VA, Timoshevskaya NY, Tsonis PA, Voss SR, Smith JJ.  
605 Initial characterization of the large genome of the salamander *Ambystoma mexicanum*  
606 using shotgun and laser capture chromosome sequencing. Sci Rep. 2015;5:16413.
- 607 28. Biscotti MA, Gerdol M, Canapa A, Forconi M, Olmo E, Pallavicini A, Barucca M, Scharl  
608 M. The lungfish transcriptome: a glimpse into molecular evolution events at the transition  
609 from water to land. Sci Rep. 2016;6:21571.
- 610 29. Zonneveld BJ. The systematic value of nuclear genome size for all species of *Tulipa* L.  
611 (Liliaceae). Plant Syst Evol. 2009; 281:217–45.
- 612 30. Gregory, TR. Animal genome size database. <http://www.genomesize.com>. Accessed  
613 November 2016.
- 614 31. Li X, Waterman MS. Estimating the repeat structure and length of DNA sequences using  
615 *l*-tuples. Genome Res. 2003;13:1916–22.

- 616 32. Vuture GW, Sedlazeck FJ, Nattestad M, Underwood CJ, Fang H, Gurtowki J, Schatz MC.  
617 GenomeScope: fast reference-free genome profiling from short reads. BioRxiv.  
618 2016;doi:10.1101/075978.
- 619 33. Walker BJ, Abeel T, Shea T, Priest M, Abouelliel A, Sakthikumar S, Cuomo CA, Zeng Q,  
620 Wortman J, Young SK, Earl AM. Pilon: an integrated tool for comprehensive microbial  
621 variant detection and genome assembly improvement. PLoS One. 2014;9:e112963.
- 622 34. Goodwin S, Gurtowski J, Ethe-Sayers S, Deshpande P, Schatz MC, McCombie WR.  
623 Oxford Nanopore sequencing, hybrid error correction, and de novo assembly of a  
624 eukaryotic genome. Genome Res. 2015;25:1–7.
- 625 35. Boetzer M, Henkel CV, Jansen HJ, Butler D, Pirovano W. Scaffolding pre-assembled  
626 contigs using SSPACE. Bioinformatics. 2011;27:578–9.
- 627 36. Henkel CV, Dirks RP, de Wijze DL, Minegishi Y, Aoyama J, Jansen HJ, Turner B,  
628 Knudsen B, Bundgaard M, Hvam KL, Boetzer M, Pirovano W, Weltzien FA, Dufour S,  
629 Tsukamoto K, Spaink HP, van den Thillart GE. First draft genome sequence of the  
630 Japanese eel, *Anguilla japonica*. Gene. 2012;511:195–201.
- 631 37. Pavey SA, Laporte M, Normandeau E, Gaudin J, Letourneau L, Boisvert S, Corbeil J,  
632 Audet C, Bernatchez L. Draft genome of the American eel (*Anguilla rostrata*). Mol Ecol  
633 Resour. 2016;doi:10.1111/1755-0998.12608.
- 634 38. Albert, V, Jónsson, B, Bernatchez, L. Natural hybrids in Atlantic eels (*Anguilla anguilla*,  
635 *A. rostrata*): evidence for successful reproduction and fluctuating abundance in space and  
636 time. Mol Ecol. 2006;15:1903–16.
- 637 39. Hunt M, Newbold C, Berriman M, Otto TD. A comprehensive evaluation of assembly  
638 scaffolding tools. Genome Biol. 2014;15:R42.
- 639 40. Chapman JA, Maschner M, Buluç A, Barry K, Georganas E, Session A, Strnadova V,  
640 Jenkins J, Sehgal S, Olikier L, Schmutz J, Yelick KA, Scholz U, Waugh R, Poland JA,

- 641 Muehlbauer GJ, Stein N, Rokhsar D. A whole-genome shotgun approach for assembling  
642 and anchoring the hexaploidy bread wheat genome. *Genome Biol.* 2015;16:26.
- 643 41. Urban JM, Bliss J, Lawrence CE, Gerbi SA. Sequencing ultra-long DNA molecules with  
644 the Oxford Nanopore MinION. *BioRxiv.* 2015;doi:10.1101/019281.
- 645 42. Datema E, Hulzink RJ, Blommer L, Valle-Inclan JE, van Orsouw N, Wittenberg AH, de  
646 Vos M. The megabase-sized fungal genome of *Rhizoctonia solani* assembled from  
647 nanopore reads only. *BioRxiv.* 2016;doi:10.1101/084772.
- 648 43. Mostovoy Y, Levy-Sakin M, Lam J, Lam ET, Hastie AR, Marks P, Lee J, Chu C, Lin C,  
649 Džakula Ž, Cao H, Schlebusch SA, Giorda K, Schnall-Levin M, Wall JD, Kwok PY. A  
650 hybrid approach for *de novo* human genome sequence assembly and phasing. *Nat*  
651 *Methods.* 2016;13:587–90.
- 652 44. Marçais G, Kingsford C. A fast, lock-free approach for efficient parallel counting of  
653 occurrences of *k*-mers. *Bioinformatics.* 2011; 27:764–70.
- 654 45. Magoc T, Salzberg S. FLASH: Fast length adjustment of short reads to improve genome  
655 assemblies. *Bioinformatics.* 2011;27:2957–63.
- 656 46. Watson M, Thomson M, Risse J, Talbot R, Santoyo-Lopez J, Gharbi K, Blaxter M. poRe:  
657 an R package for the visualization and analysis of nanopore sequencing data.  
658 *Bioinformatics.* 2015;31:114–5.
- 659 47. Li H, Durbin R. Fast and accurate long-read alignment with Burrows-Wheeler transform.  
660 *Bioinformatics.* 2010;26:589–95.
- 661 48. Oxford Nanopore Technologies. Hybrid assembly pipeline.  
662 <https://github.com/nanoporetech/ont-assembly-polish>. Accessed December 2016.
- 663 49. Sović I, Šikić M, Wilm A, Fenlon SN, Chen S, Nagarajan N. Fast and sensitive mapping  
664 of nanopore sequencing reads with GraphMap. *Nat Commun.* 2016;7:11307.

665 50. Lee, C. Generating consensus sequences from partial order multiple sequence alignment  
666 graphs. *Bioinformatics*. 2003;19:999–1008.

667 51. Joshi NA, Fass JN. Sickle: A sliding-window, adaptive, quality-based trimming tool for  
668 FastQ files. <https://github.com/najoshi/sickle>. Accessed December 2016.

669 52. Kurtz S, Phillippy A, Delcher AL, Smoot M, Shumway M, Antonescu C, Salzberg SL.  
670 Versatile and open software for comparing large genomes. *Genome Biol*. 2004;5:R12.

671

## 672 **Figure legends**

### 673 *Fig. 1. Nanopore sequencing*

674 Shown are the sequenced fragment size distributions for the **a** R7.3 chemistry 2D reads, **b** R9  
675 chemistry 1D reads, **c** R9 chemistry 2D reads and **d** R9.4 chemistry 1D reads. Dotted lines  
676 indicate the minimum (542 bp) and typical (1270 bp) read lengths that can be used for linking  
677 two seeds in the 0.29× coverage 285 bp set. The minimum length is 2×285 bp with no more  
678 than 10% overlap between seeds. The typical length assumes an average of one seed per 985  
679 bp (genome size divided by number of seeds).

680

### 681 *Fig. 2. Assembly strategy*

682 **a** Stages in TULIP. **b** Graph construction based on long read alignments to short seeds. Seeds  
683 are included in the graph as nodes if they align adjacent to each other to a long read. The  
684 apparent distance between the seeds is included as an edge property, as is the amount of  
685 evidence (i.e. number of alignments supporting the connection). **c** The initial seed graph based  
686 on alignments contains ambiguities, caused by missed alignments, repetitive seed sequences  
687 and spurious alignments. These are removed during the initial layout process, resulting in

688 linear scaffolds. Where possible, these scaffolds are subsequently linked by further  
689 unambiguous long-distance co-alignments to long reads.

690

691 *Fig. 3. Graph simplifications*

692 Scaffolds were extracted from a graph consisting of seed sequences (nodes) linked by  
693 nanopore reads (edges). Here, a small final scaffold (number 2231, 252.2 kbp) is shown in red  
694 in the context of the initial seed graph (all seeds at a distance of up to ten links from the final  
695 scaffold). Fragments of ten other scaffolds (blues) are directly or indirectly connected to  
696 scaffold 2231 by a few incorrect links (dotted lines). Seeds and links removed during graph  
697 simplification are shown in grey. Scaffolds can be discontinuous in the initial graph, as  
698 additional long-distance links are added in a later stage. The graph was visualized using  
699 Cytoscape (version 3.4.0).

700

701 *Fig. 4. Characteristics of the final assembly*

702 **a** Size distribution of final scaffolds, based on 285 bp seeds. Colours indicate alternative  
703 assembly runs, using subsets of the long read data. **b** Cumulative size of the final scaffolds,  
704 sorted by size. **c** and **d** Size distributions and cumulative size distributions for final scaffolds,  
705 based on both 270 and 285 bp seeds. Colours indicate alternative assembly runs, using  
706 different seeds sets. **e** Link evidence distribution in the initial graph (purple) and the final  
707 graph (orange) for the candidate assembly (285 bp seeds). **f** Distances between seeds in the  
708 initial graph (purple) and the final graph (orange) for the candidate assembly (285 bp seeds).

709



710 *Fig. 5. Full-genome alignment of the final assembly*

711 **a** The final uncorrected scaffolds (N50 = 1.19 Mbp, y-axis) were aligned to the 2012 *A.*  
712 *anguilla* assembly (N50 = 77.6 kbp, x-axis) using nucmer [51] with minimum match length  
713 100, filtered for best pairwise matches between scaffolds (delta-filter -1), and plotted using  
714 the mummerplot --layout option. The grey area corresponds to small scaffolds in the 2012  
715 assembly that are not part of a best reciprocal match. **(b–f)** More detailed alignments between  
716 the five largest nanopore scaffolds (y-axes) and their best matches in the 2012 draft assembly  
717 (x-axes). Grey horizontal and vertical lines indicate scaffold boundaries. These figures were  
718 generated in R (version 3.3.1) based on mummerplot output. 2012 draft scaffolds with  
719 minimal contributions to the overall alignment were removed manually. Arrowheads indicate  
720 discrepancies between both assemblies.

721

722 *Fig. 6. Sequence identity in nanopore-based assemblies*

723 The sequence similarity to the older draft of different stages of the nanopore assembly process  
724 (uncorrected TULIP, corrected by Racon, and additionally corrected by Pilon) is illustrated by  
725 6-mer frequency counts (generated using Jellyfish). With every point a discrete 6-mer, colours  
726 indicate CG-content, and open circles indicate the two homo-6-mers. Scales are logarithmic.  
727 Also shown are Pearson correlation coefficients between the frequency distributions.

728

729 *Fig. S1. GenomeScope k-mer profiles*

730 Shown are the 19-mer profile analyses for **a** *A. anguilla*, **b** *A. japonica* and **c** *A. rostrata*. Both  
731 regular and logarithmic scale plots are included. The full analyses are available at the  
732 GenomeScope website (<http://qb.cshl.edu/genomescope/analysis.php>) using the codes

733 TDVyzdJXugs2IEcd2AB (*A. anguilla*), VtNZvSIV7nzfq6yvTlAp (*A. japonica*) and  
734 8citu1cxv9SHXOzqbA43 (*A. rostrata*).

735

736 *Fig. S2. Misassembly scenarios*

737 If draft scaffolds do not align completely to a single nanopore scaffold, this is apparent in the  
738 alignment plot (a). The origins of the actual situation (b) can be gleaned from the nanopore  
739 graph (c). Based on the local graph context around the inconsistency, multiple explanations  
740 are possible: nanopore evidence can exist to support the nanopore scaffolds only (in which  
741 case the draft scaffold is probably incorrect), to support the draft scaffold only (in which case  
742 the nanopore scaffold is incorrect), or to support both (in which case additional evidence  
743 needs to be examined to determine the correct scaffolding path).

744

745 *Fig. S3–S7. Local graph neighbourhoods of scaffold inconsistencies.*

746 For each of the inconsistencies identified in Fig. 5b–f, the local neighbourhood in the initial  
747 seed graph is shown (similar to Fig. 3 and Supplementary Fig. 2c). Red and green nodes  
748 represent seeds that align to the truncated old scaffold and its non-truncated neighbour,  
749 respectively. Grey nodes do not align to these scaffolds (or at least, not locally), yellow nodes  
750 align partially to two scaffolds. The final extracted TULIP scaffold paths are indicated by blue  
751 arrows. As in the draft the ‘red’ scaffolds do not end at the joins to the ‘green’ scaffolds, an  
752 alternative path possibility of continuing with ‘red’ seeds would be expected at this point. In  
753 none of the cases examined does this appear to be the case.

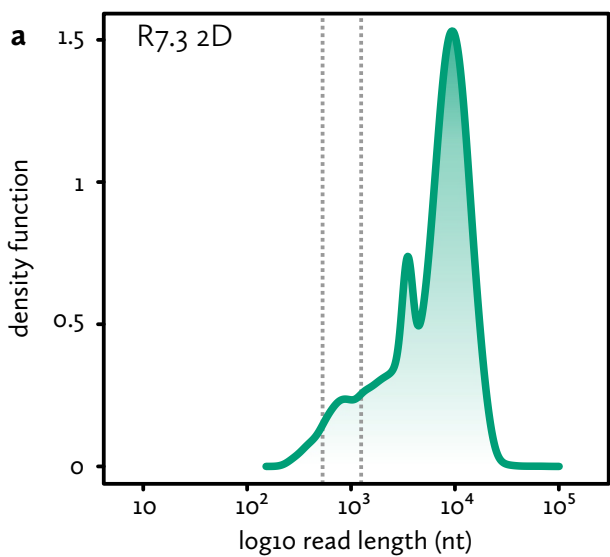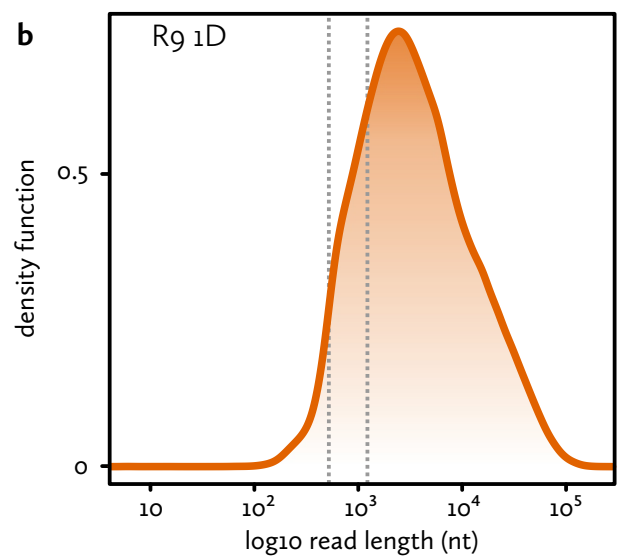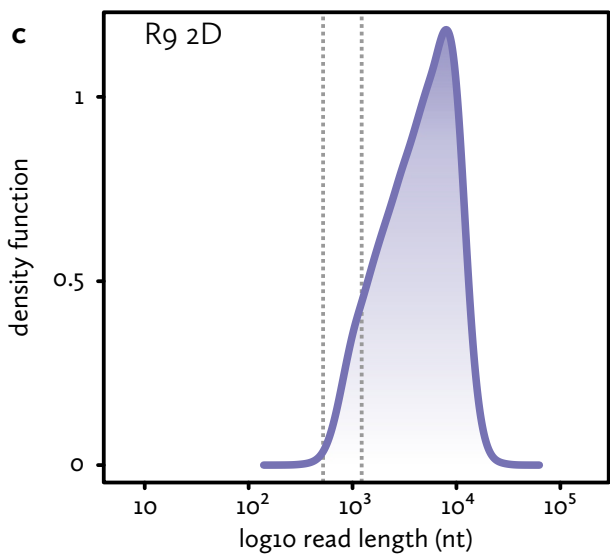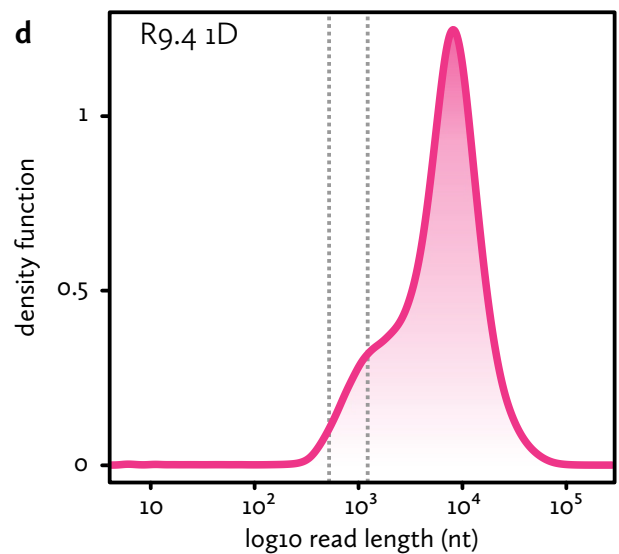

*figure 1*

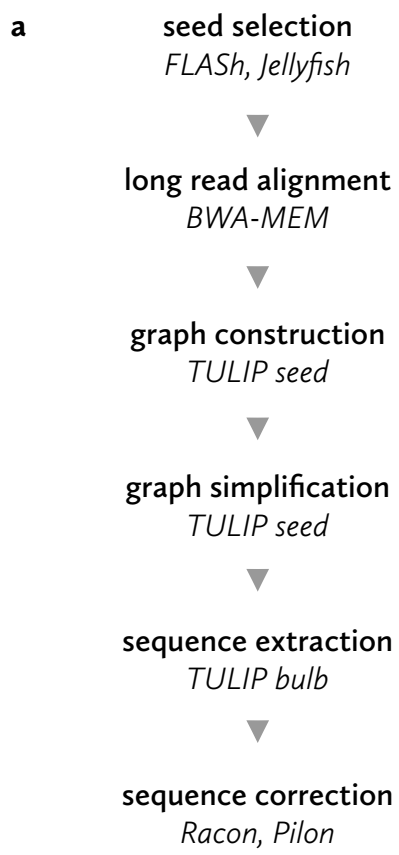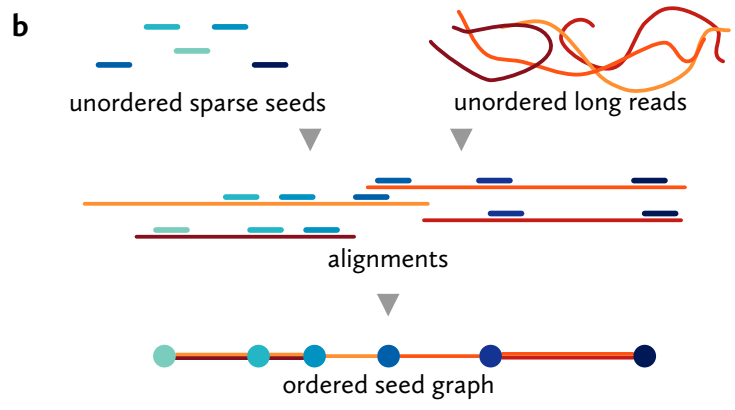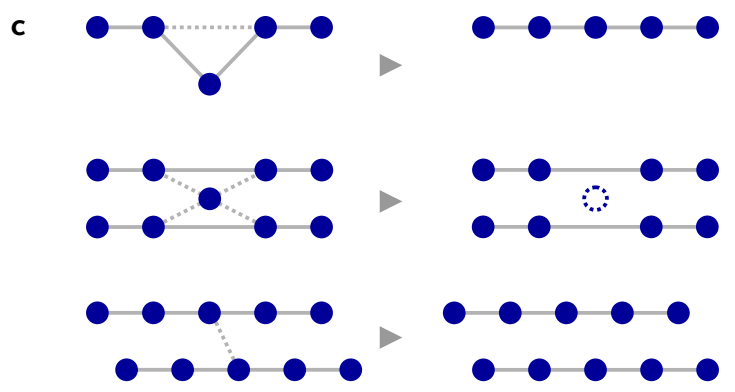

*figure 2*

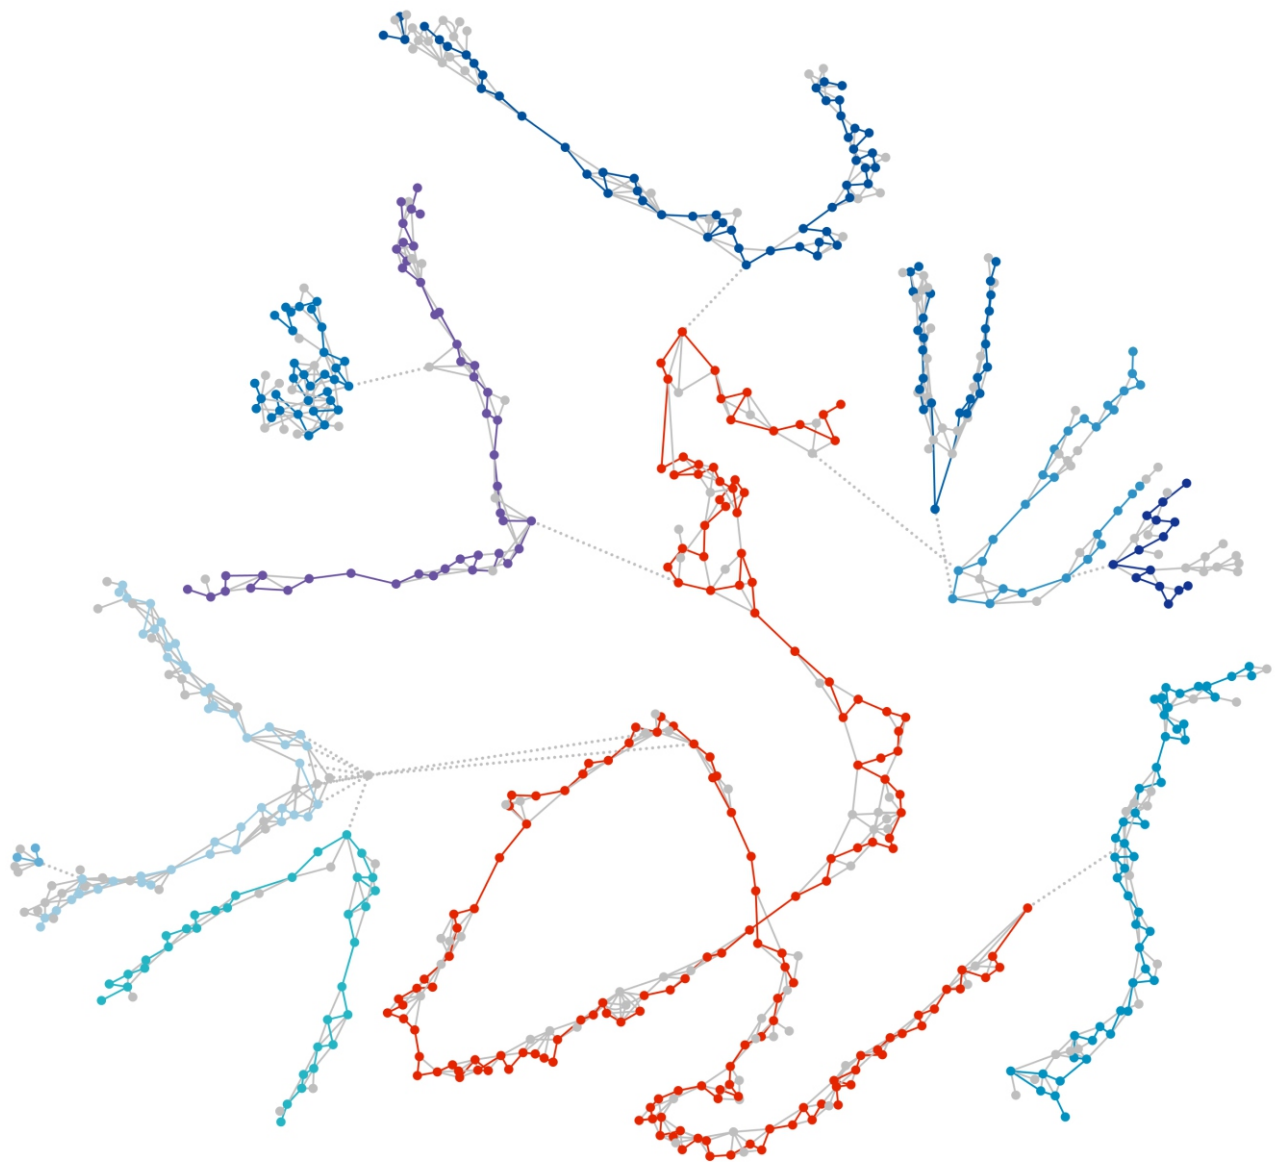

*figure 3*

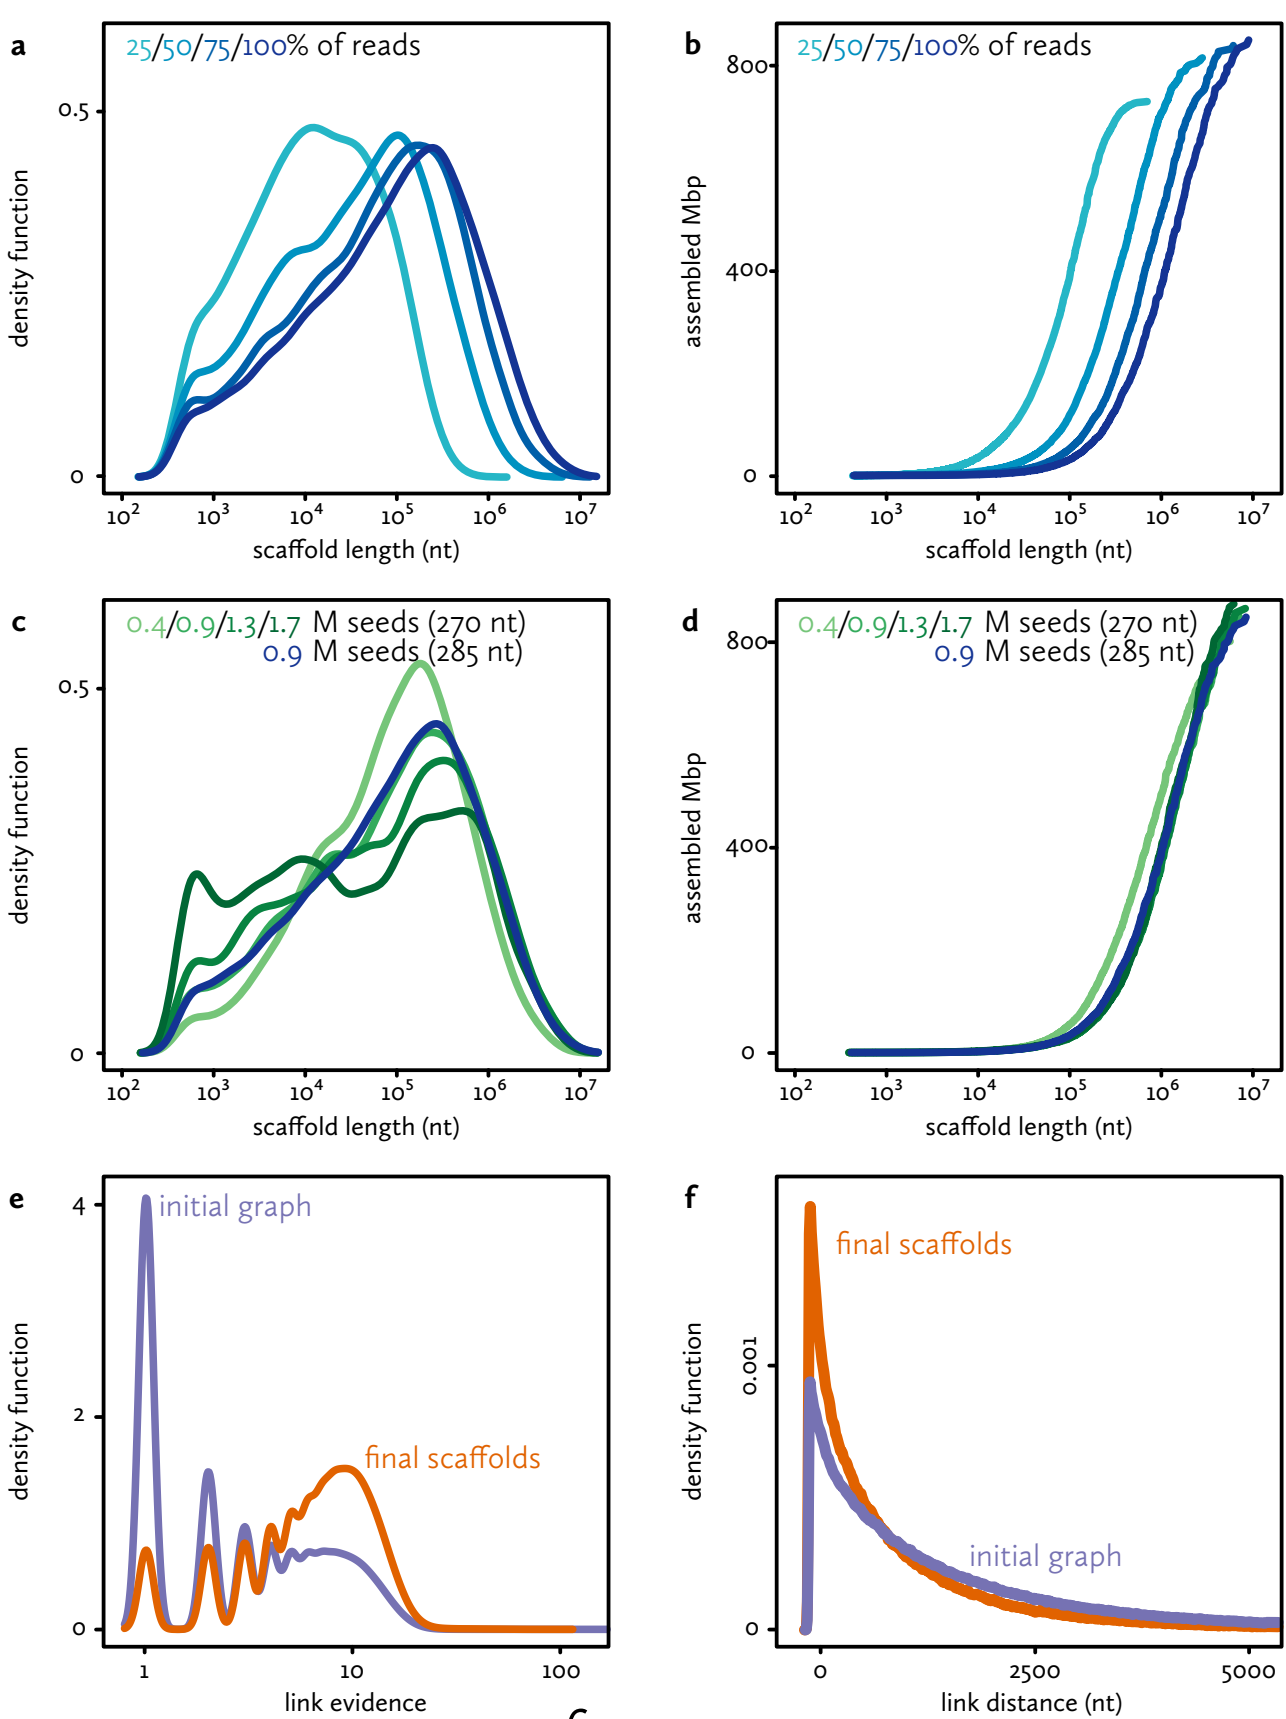

figure 4

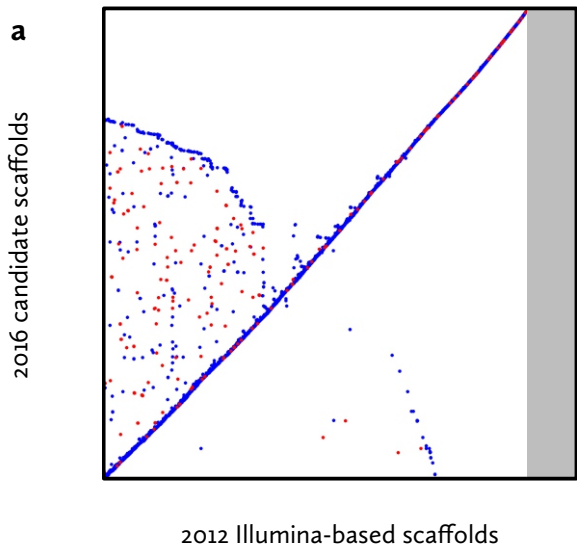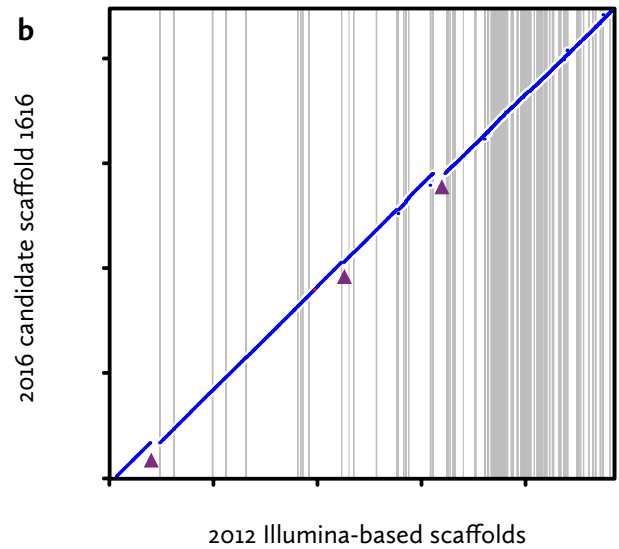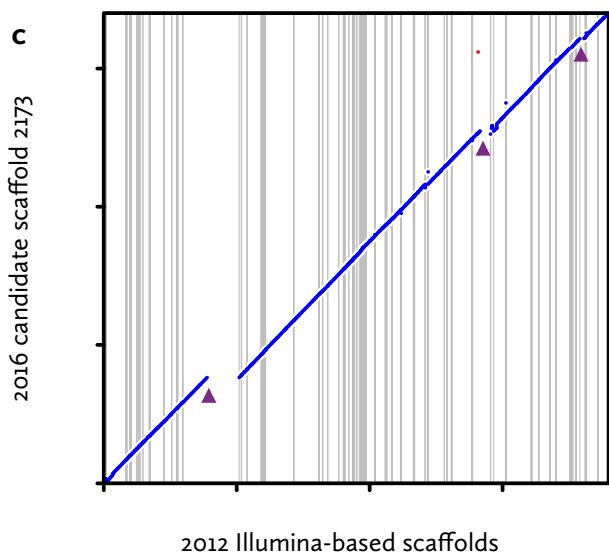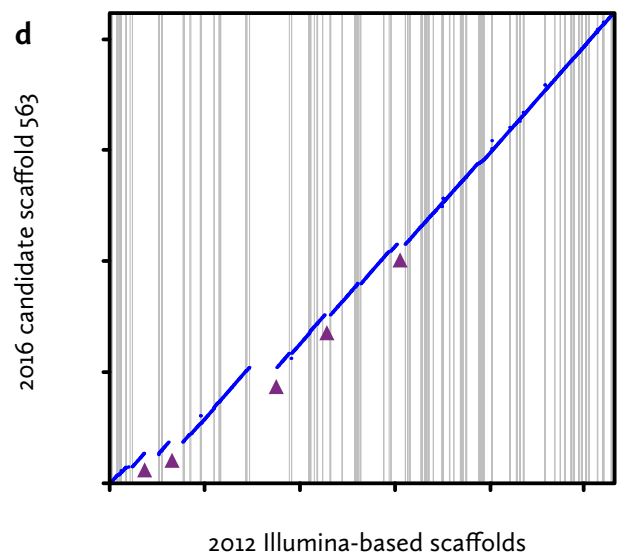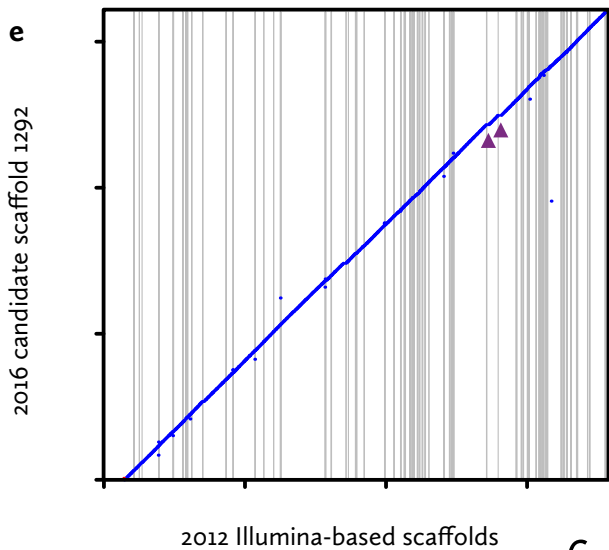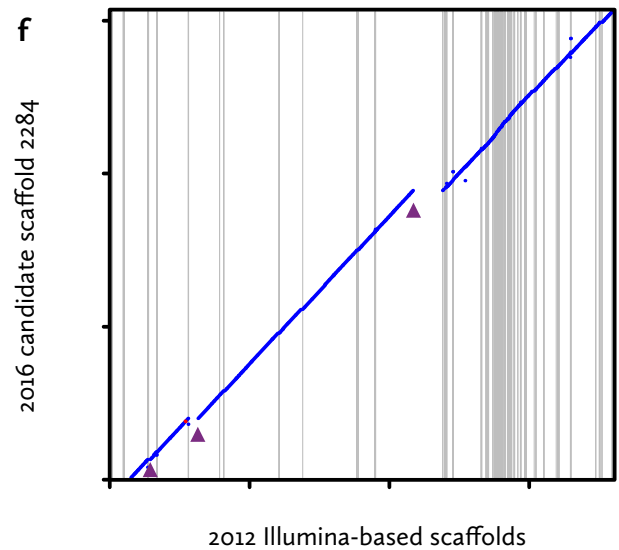

*figure 5*

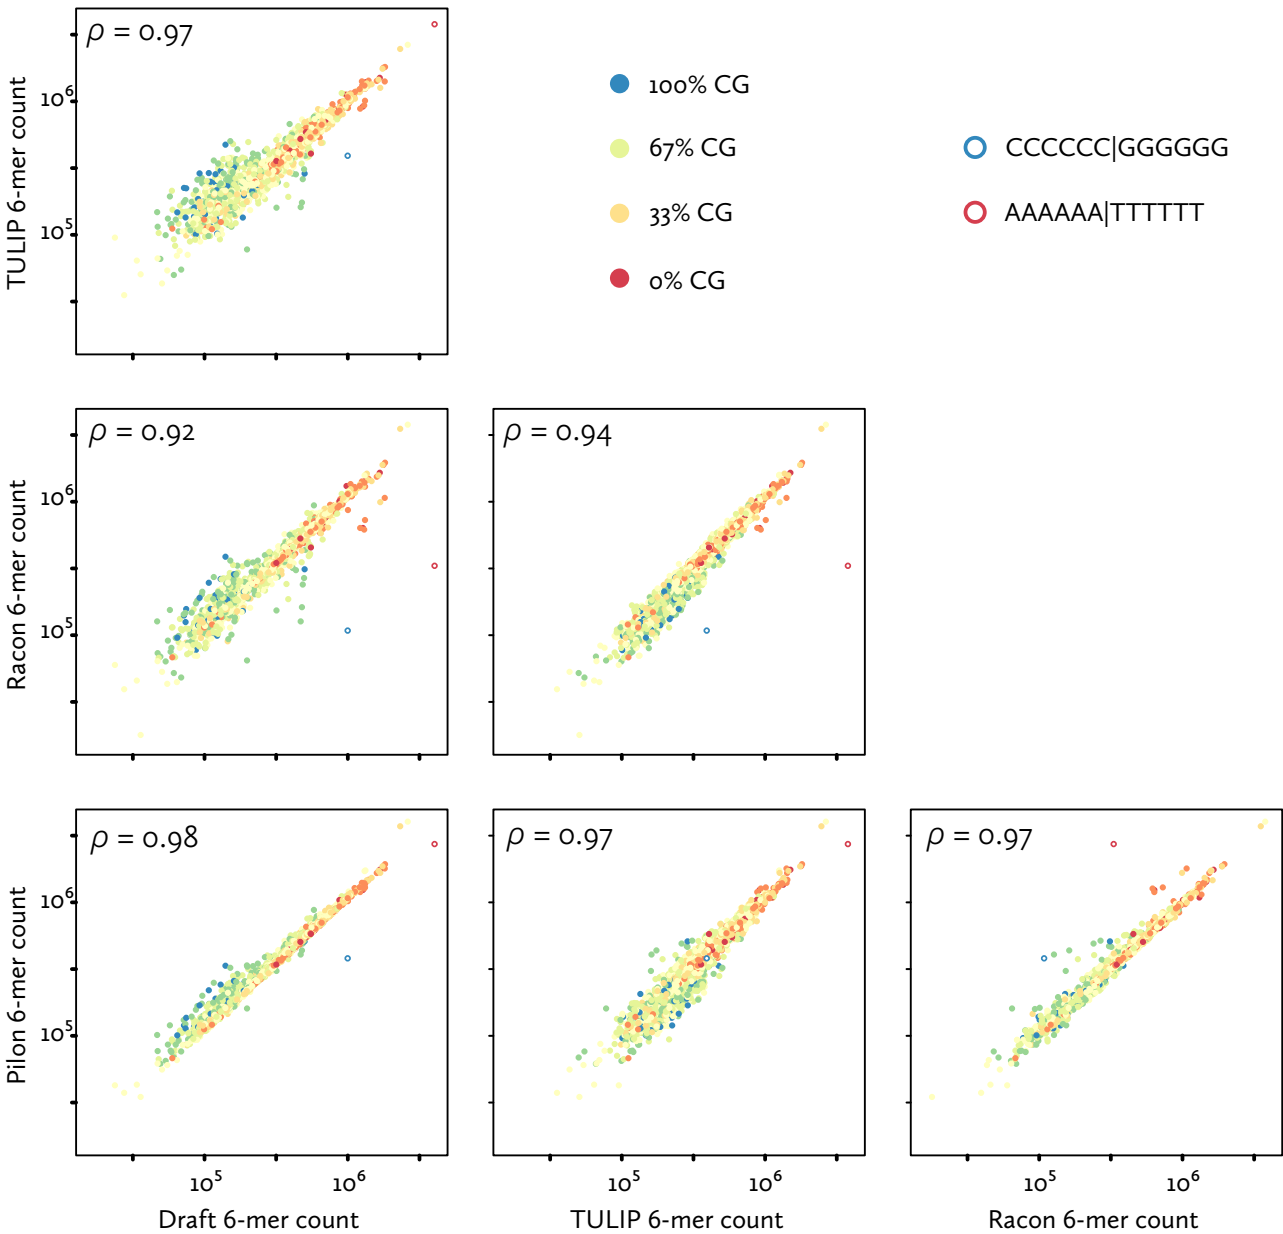

*figure 6*



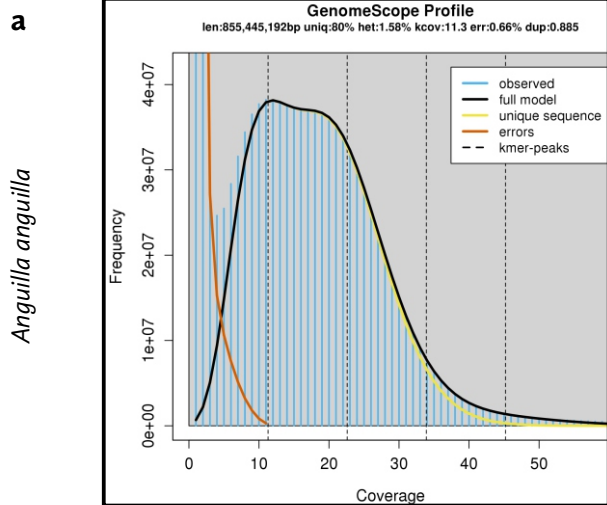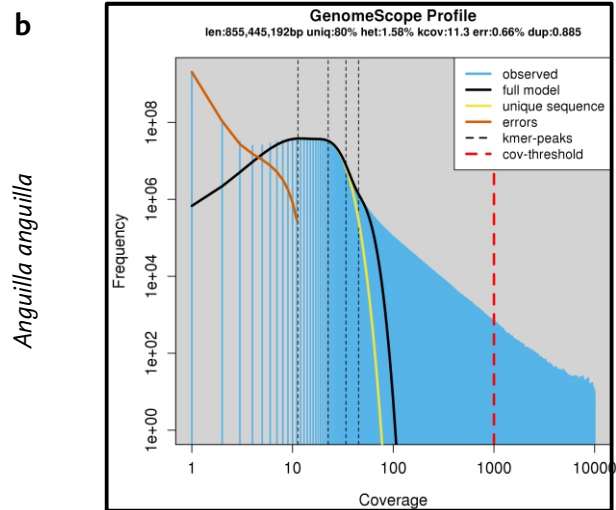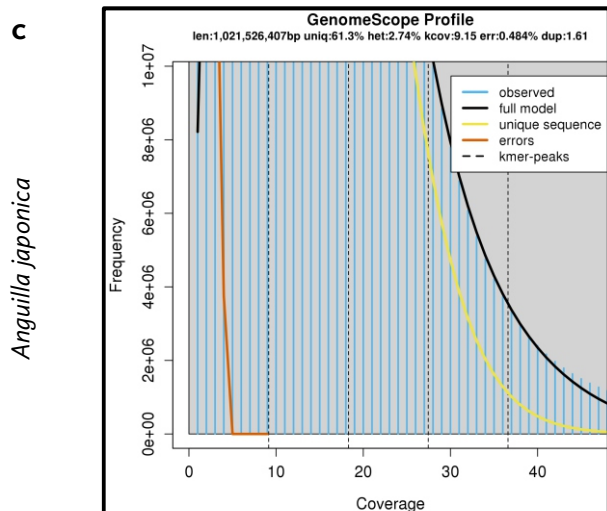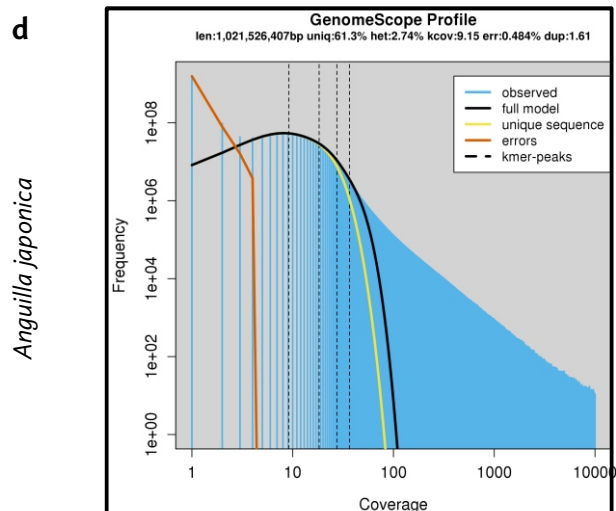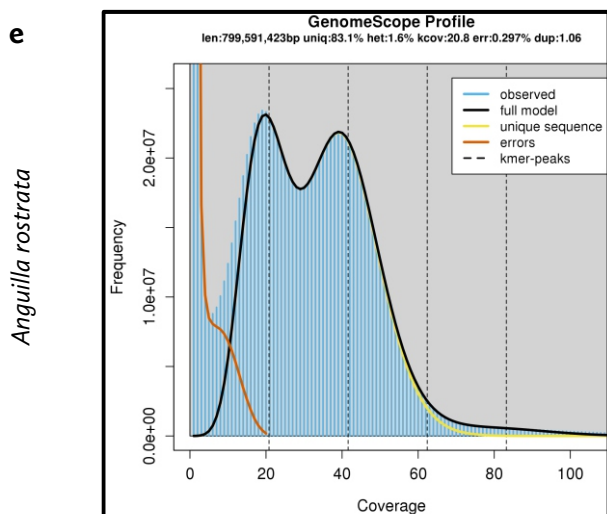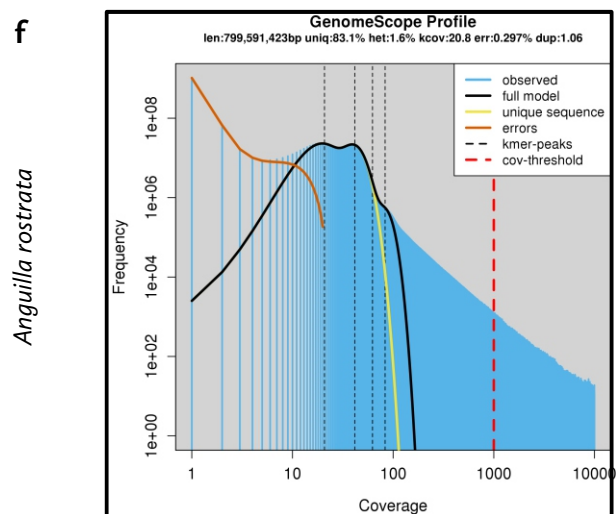

figure S1

a

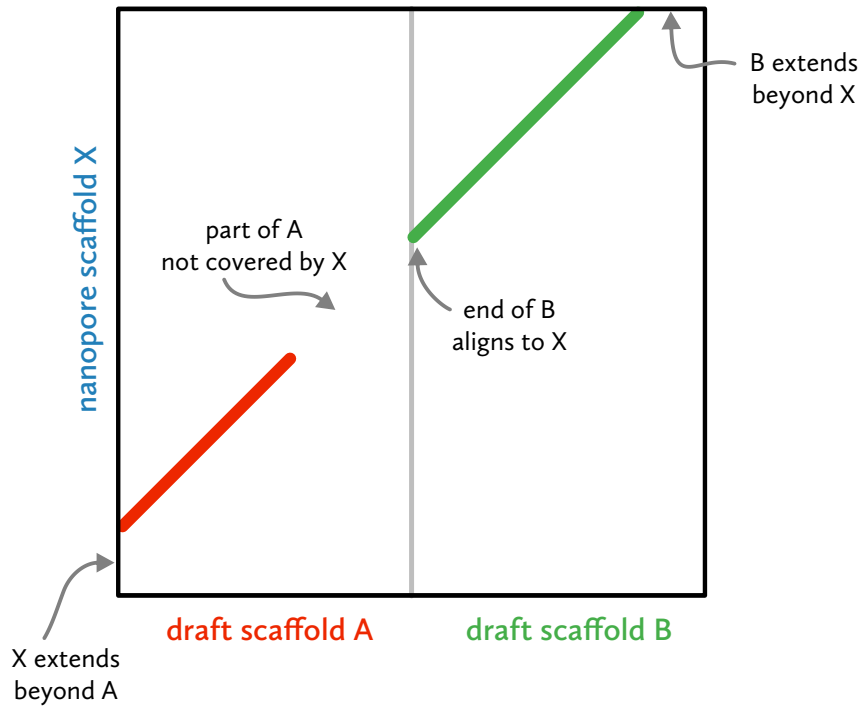

b

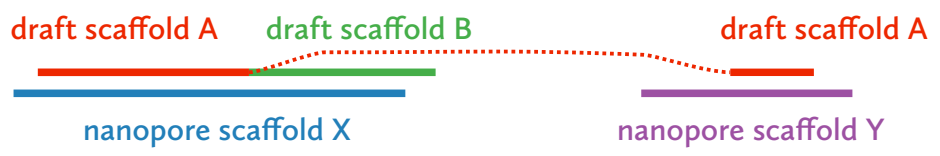

c

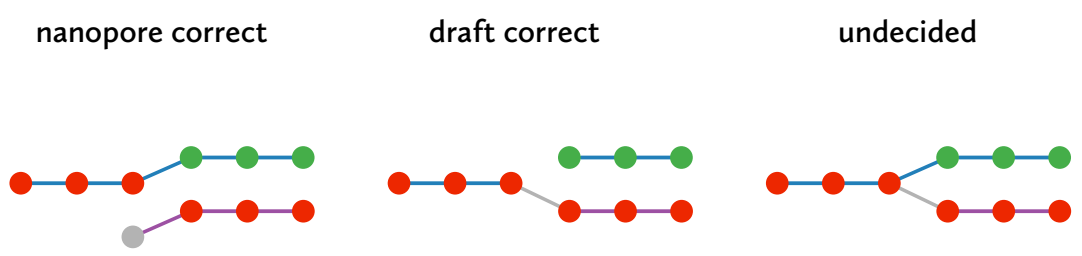

figure S2

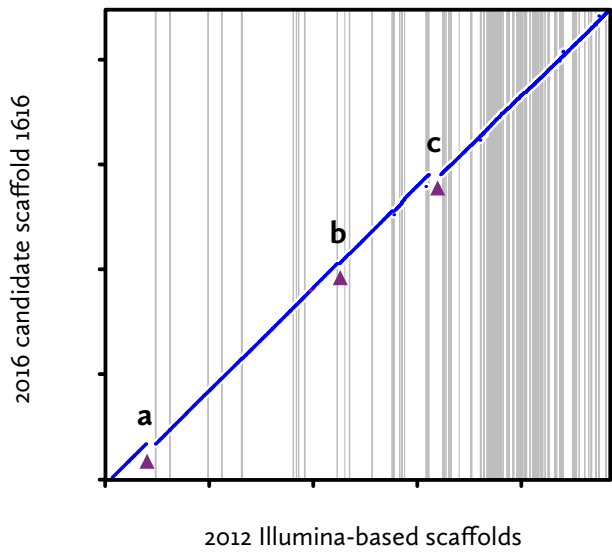

a

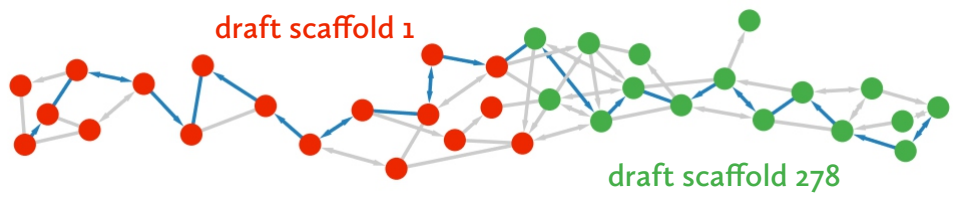

b

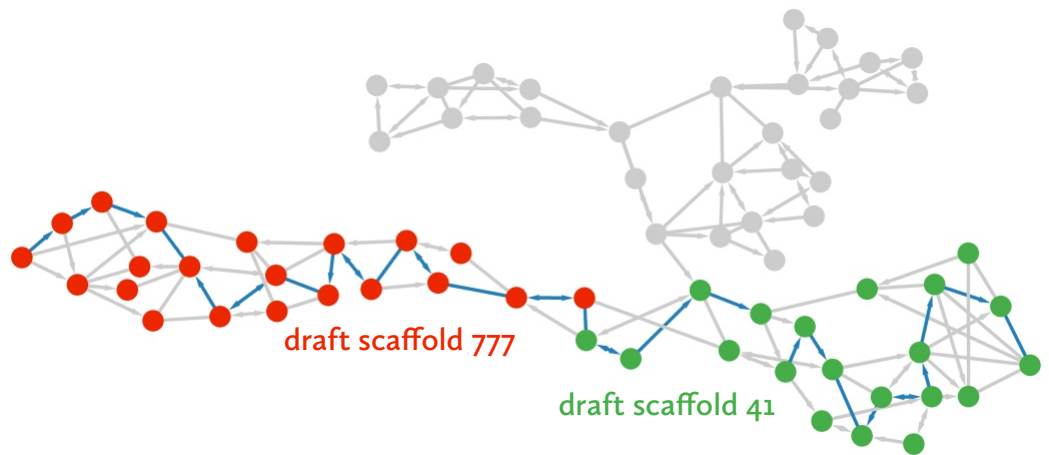

c

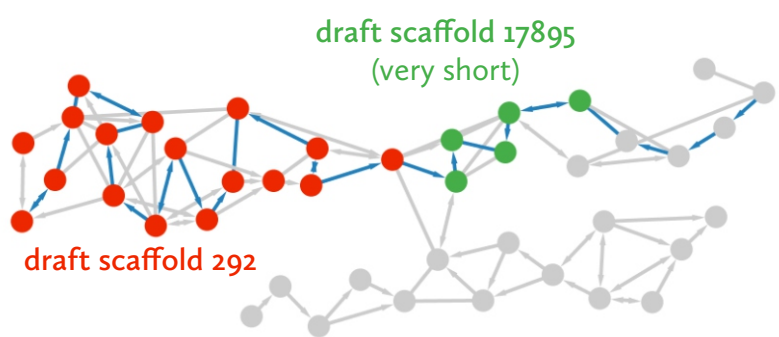

*figure S3*

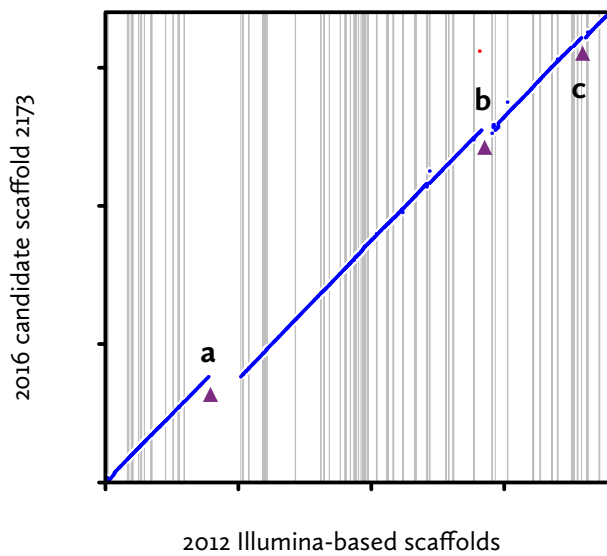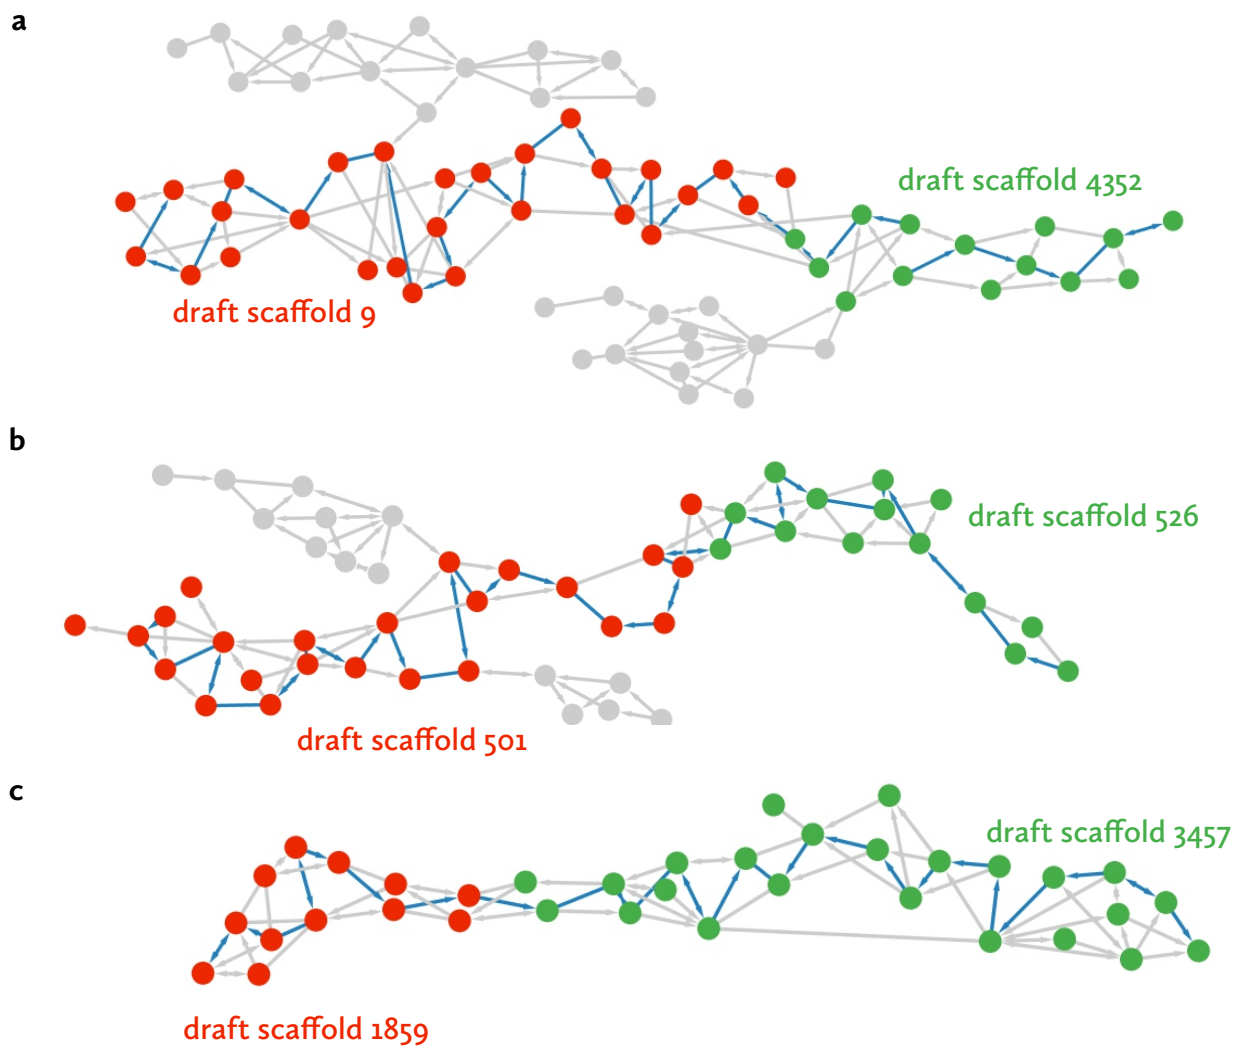

figure S4

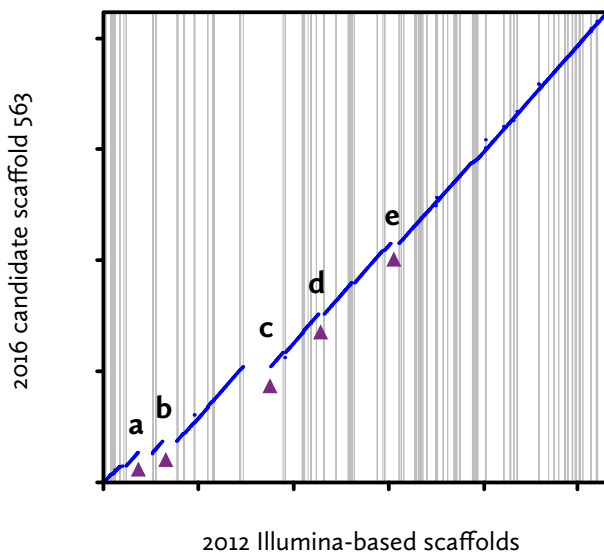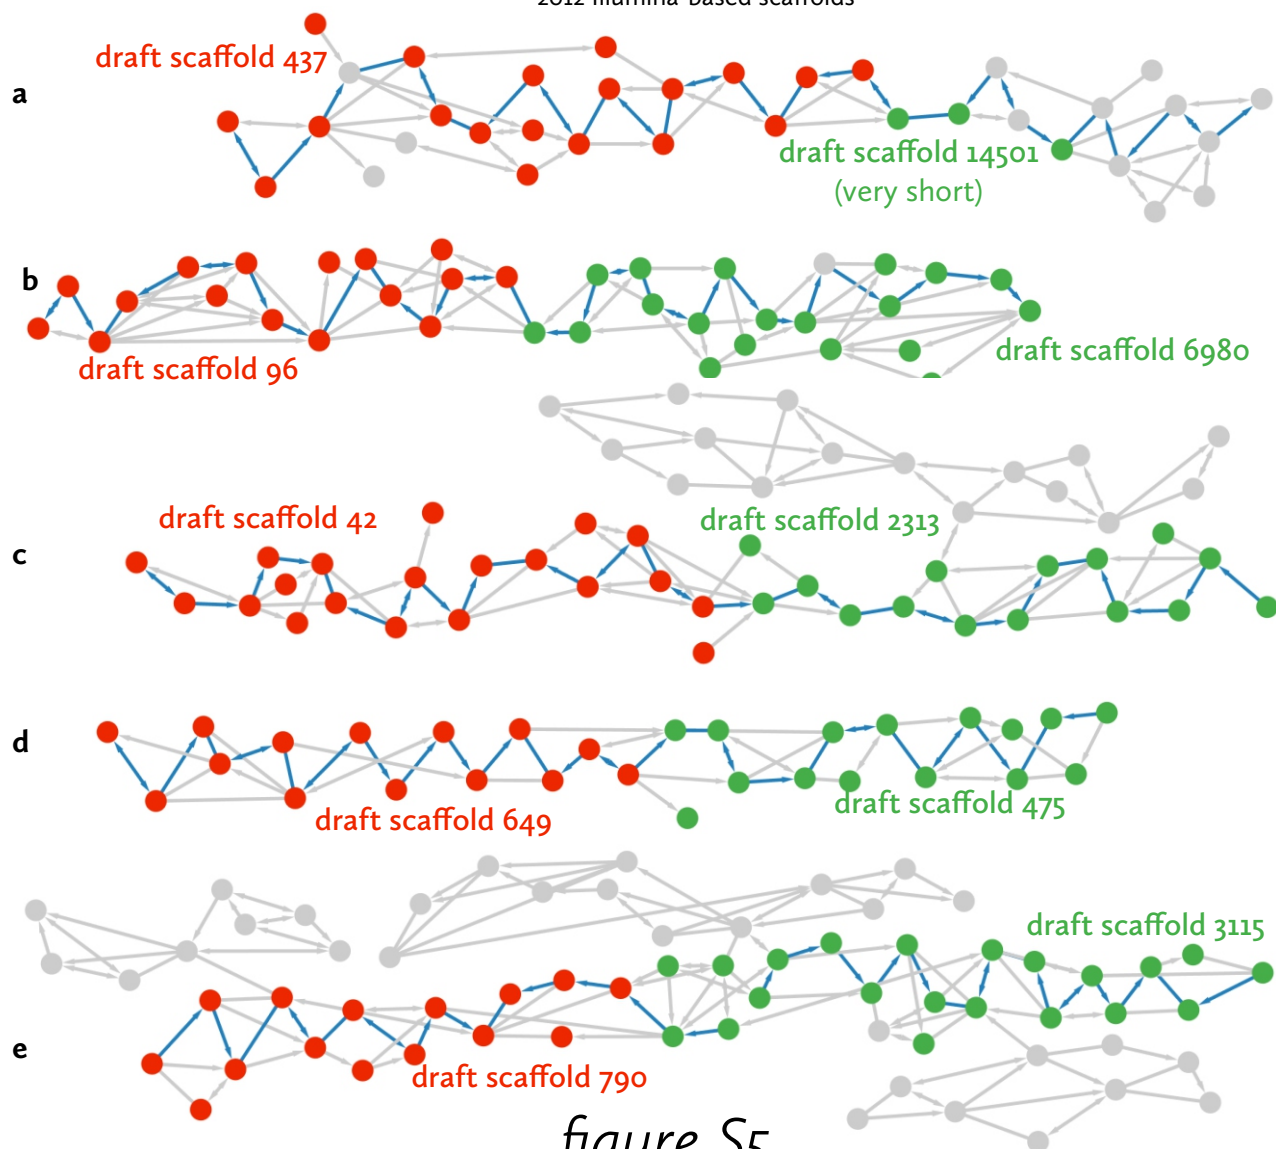

figure S5

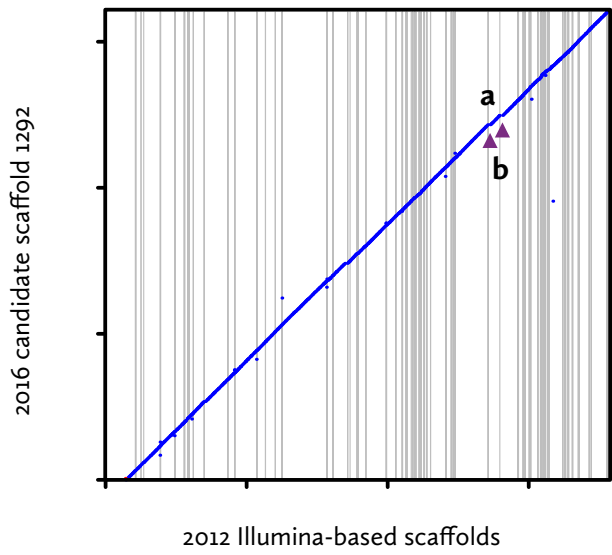

a

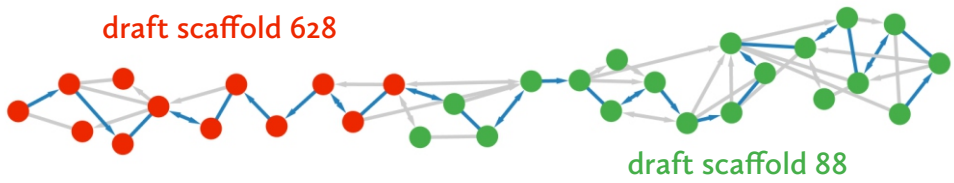

b

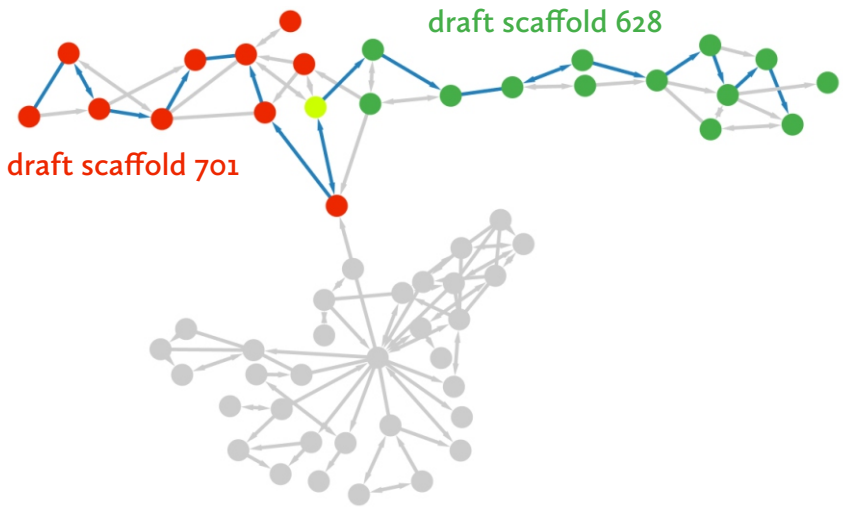

figure S6

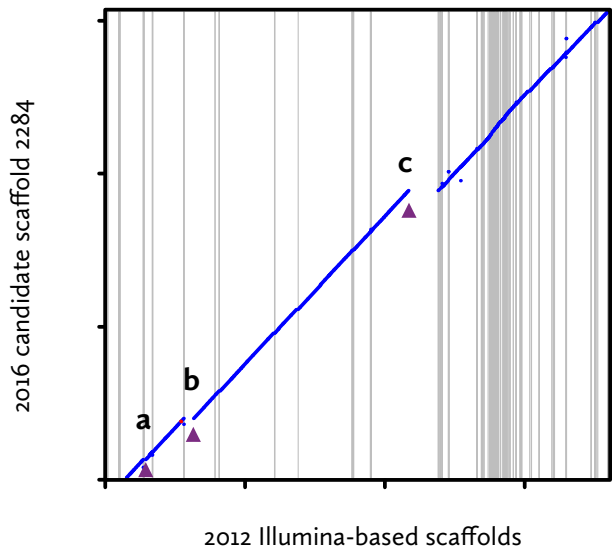

a

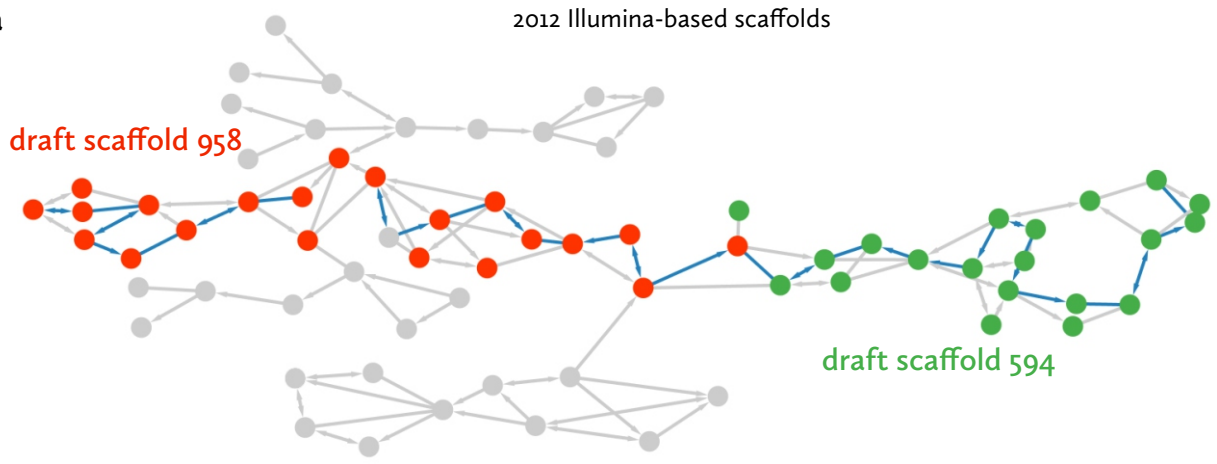

b

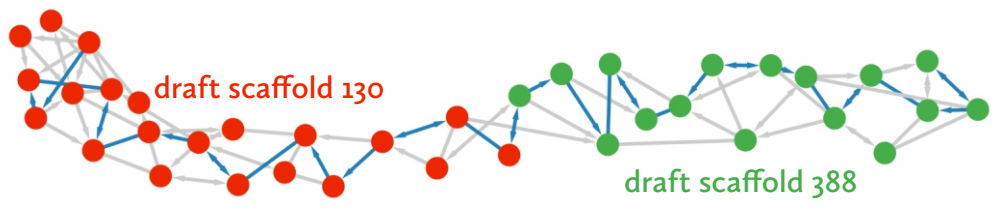

c

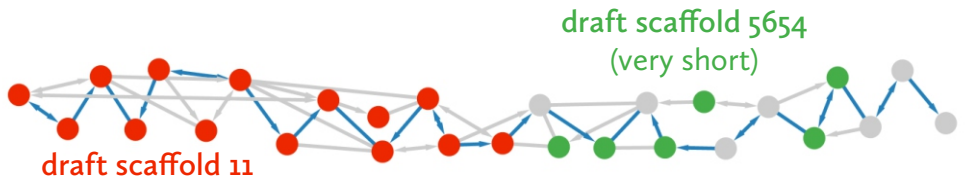

figure S7
